# Supplementary material for: A substrate-dependent mechanism for the reactions of a hydrido(hydrosilylene)ruthenium complex with carbonyl compounds: insights from quantum chemical calculations
Source: Royal Society of Chemistry journal article supplement (doi:10.1039/c6nj02361d), 2016-11-17
Supplement: c6nj02361d1.pdf [file c6nj02361d1.pdf]

## Supporting Information For

# Substrate-Dependent Mechanism for the Reactions of a Hyrido(hydrosilylene)ruthenium Complex with Carbonyl Compounds: Insights from Quantum Chemical Calculations

J Kuang<sup>a</sup> Yang Li<sup>a</sup> Lihong Wang<sup>a</sup> Zunyi Wu<sup>\*a</sup> Qunfang Lei<sup>b</sup> Wenjun Fang<sup>b</sup> and  
Hujun Xie<sup>\*a</sup>

<sup>a</sup> Department of Applied Chemistry, Zhejiang Gongshang University, Hangzhou 310018, People's Republic of China. E-mail: [hujunxie@gmail.com](mailto:hujunxie@gmail.com)

<sup>b</sup> Department of Chemistry, Zhejiang University, Hangzhou 310027, People's Republic of China.

### Cartesian coordinates and electronic energies for all of the calculated structures

|                       |           |           |           |                       |           |           |           |
|-----------------------|-----------|-----------|-----------|-----------------------|-----------|-----------|-----------|
| <b>1</b>              |           |           |           | H                     | -5.100162 | -1.125106 | 1.459597  |
| SCF done: -657.575703 |           |           |           | H                     | -2.957421 | -2.238273 | 1.475761  |
| Ru                    | 0.746901  | -0.256031 | -0.199594 | H                     | 0.200859  | -0.341057 | -1.723936 |
| Si                    | -1.276131 | 0.665238  | 0.221396  |                       |           |           |           |
| H                     | -1.401809 | 2.056114  | 0.802542  | <b>2a</b>             |           |           |           |
| Si                    | -4.218928 | 1.684967  | -0.140320 | SCF done: -850.740948 |           |           |           |
| Si                    | -3.311129 | -0.914791 | -1.627927 | Ru                    | 1.002763  | 0.016666  | -0.447738 |
| O                     | -0.188741 | -3.137674 | -0.023892 | Si                    | -1.154354 | 0.174047  | 0.439218  |
| C                     | -3.095473 | 0.136487  | -0.036560 | H                     | -1.278598 | 0.642558  | 1.874186  |
| C                     | 0.133572  | -2.023455 | -0.081832 | Si                    | -4.003842 | -0.582212 | 1.559925  |
| C                     | 2.739043  | 0.574407  | -1.050931 | Si                    | -3.507712 | -0.800419 | -1.501479 |
| C                     | 3.049085  | -0.553361 | -0.229966 | O                     | -2.167502 | 1.773254  | -0.277689 |
| C                     | 2.648194  | -0.240123 | 1.124244  | O                     | 0.131009  | -1.543832 | -2.887563 |
| C                     | 2.114793  | 1.090968  | 1.131917  | C                     | -2.694329 | -0.973030 | 0.226295  |
| C                     | 2.149669  | 1.592453  | -0.216596 | C                     | 0.424632  | -0.935086 | -1.936880 |
| C                     | 3.090571  | 0.731669  | -2.503766 | C                     | 2.982109  | 1.035387  | 0.267662  |
| H                     | 4.086439  | 1.184262  | -2.611264 | C                     | 3.307867  | -0.127988 | -0.504835 |
| H                     | 2.376353  | 1.375095  | -3.024499 | C                     | 2.815599  | -1.283604 | 0.213545  |
| H                     | 3.106378  | -0.231621 | -3.020480 | C                     | 2.178125  | -0.829900 | 1.406322  |
| C                     | 3.778920  | -1.793441 | -0.665656 | C                     | 2.268439  | 0.615020  | 1.435453  |
| H                     | 3.575272  | -2.031945 | -1.713452 | C                     | 3.427052  | 2.437889  | -0.043702 |
| H                     | 3.491515  | -2.663413 | -0.067946 | H                     | 4.427435  | 2.630018  | 0.369843  |
| H                     | 4.865597  | -1.666711 | -0.559329 | H                     | 2.750865  | 3.185008  | 0.383395  |
| C                     | 2.910153  | -1.096193 | 2.332384  | H                     | 3.475806  | 2.613759  | -1.121860 |
| H                     | 2.192176  | -0.896912 | 3.132970  | C                     | 4.168928  | -0.158256 | -1.737395 |
| H                     | 3.915732  | -0.907045 | 2.734491  | H                     | 4.041994  | 0.746977  | -2.338786 |
| H                     | 2.849243  | -2.161719 | 2.092847  | H                     | 3.925608  | -1.011665 | -2.377280 |
| C                     | 1.722482  | 1.881408  | 2.348655  | H                     | 5.234888  | -0.235957 | -1.477271 |
| H                     | 2.572121  | 2.475663  | 2.713939  | C                     | 3.061922  | -2.717667 | -0.166382 |
| H                     | 1.400963  | 1.229031  | 3.165300  | H                     | 2.277866  | -3.376492 | 0.217803  |
| H                     | 0.904771  | 2.576547  | 2.136258  | H                     | 4.020494  | -3.070879 | 0.240151  |
| C                     | 1.830868  | 2.999651  | -0.640830 | H                     | 3.099354  | -2.849147 | -1.251963 |
| H                     | 1.030165  | 3.434011  | -0.035189 | C                     | 1.682402  | -1.689345 | 2.535931  |
| H                     | 1.515161  | 3.041888  | -1.687042 | H                     | 2.481298  | -1.865910 | 3.271737  |
| H                     | 2.712060  | 3.648607  | -0.534470 | H                     | 1.340061  | -2.666643 | 2.184238  |
| H                     | -4.722635 | -1.378050 | -1.719454 | H                     | 0.849599  | -1.220472 | 3.068742  |
| H                     | -5.609981 | 1.299140  | -0.498668 | C                     | 1.877247  | 1.475428  | 2.604576  |
| H                     | -3.022012 | -0.089574 | -2.828844 | H                     | 0.910536  | 1.178067  | 3.025815  |
| H                     | -3.717740 | 2.625495  | -1.176276 | H                     | 1.808677  | 2.531569  | 2.325227  |
| H                     | -2.430376 | -2.103823 | -1.626527 | H                     | 2.618602  | 1.403547  | 3.413545  |
| H                     | -4.252280 | 2.396992  | 1.163350  | H                     | -4.189979 | -2.070007 | -1.872934 |
| Si                    | -3.628225 | -0.915916 | 1.483103  | H                     | -5.277740 | -1.309923 | 1.302538  |
| H                     | -3.283603 | -0.216625 | 2.749686  | H                     | -4.547933 | 0.263956  | -1.493376 |

|                         |           |           |           |                         |           |           |           |
|-------------------------|-----------|-----------|-----------|-------------------------|-----------|-----------|-----------|
| H                       | -4.316180 | 0.872065  | 1.590373  | H                       | -2.117584 | 3.036303  | -2.329359 |
| H                       | -2.524139 | -0.473965 | -2.558861 | H                       | -3.375828 | 3.654607  | -1.258153 |
| H                       | -3.524450 | -0.975394 | 2.912378  | H                       | -1.869156 | 4.584445  | -1.474445 |
| Si                      | -2.110896 | -2.785206 | 0.453270  |                         |           |           |           |
| H                       | -1.253841 | -2.919762 | 1.661618  | <b>3a</b>               |           |           |           |
| H                       | -3.295674 | -3.664935 | 0.649974  | SCF done: -850.735721   |           |           |           |
| H                       | -1.357696 | -3.282069 | -0.722270 | Ru                      | 1.074894  | 0.240207  | -0.506874 |
| C                       | -1.896005 | 2.985754  | -0.245725 | Si                      | -1.233623 | 0.372879  | 0.421733  |
| H                       | 0.625777  | 1.334542  | -1.317516 | H                       | -1.069820 | 0.578954  | 1.901277  |
| C                       | -0.778648 | 3.510537  | 0.595135  | Si                      | -3.743854 | -0.908465 | 1.717726  |
| H                       | 0.142591  | 3.010250  | 0.258087  | Si                      | -3.586183 | -0.734010 | -1.373743 |
| H                       | -0.676599 | 4.595349  | 0.525848  | O                       | -2.229469 | 1.672303  | -0.150034 |
| H                       | -0.926823 | 3.212994  | 1.639856  | O                       | -0.074275 | -1.114897 | -2.971779 |
| C                       | -2.691510 | 3.921852  | -1.104009 | C                       | -2.546337 | -1.024980 | 0.220111  |
| H                       | -3.480048 | 3.388337  | -1.636506 | C                       | 0.305657  | -0.605405 | -2.004406 |
| H                       | -3.121532 | 4.721714  | -0.488665 | C                       | 3.191715  | 0.783966  | 0.173065  |
| H                       | -2.017586 | 4.404958  | -1.824577 | C                       | 3.223836  | -0.508413 | -0.463871 |
|                         |           |           |           | C                       | 2.472859  | -1.426008 | 0.360894  |
|                         |           |           |           | C                       | 1.970696  | -0.700067 | 1.488008  |
| <b>TS<sub>23a</sub></b> |           |           |           | C                       | 2.392581  | 0.672472  | 1.358313  |
| SCF done: -850.7172855  |           |           |           | C                       | 3.965558  | 2.000695  | -0.252100 |
| Ru                      | 0.958073  | 0.207365  | -0.434396 | H                       | 4.946057  | 2.020206  | 0.243333  |
| Si                      | -1.290793 | 0.201435  | 0.518176  | H                       | 3.442220  | 2.923768  | 0.011147  |
| H                       | -1.208968 | 0.414529  | 2.008285  | H                       | 4.138175  | 2.013056  | -1.331386 |
| Si                      | -3.899314 | -0.977768 | 1.772130  | C                       | 4.053754  | -0.882394 | -1.660956 |
| Si                      | -3.679900 | -0.793686 | -1.317970 | H                       | 4.176046  | -0.037978 | -2.344809 |
| O                       | -2.242900 | 1.646492  | -0.016198 | H                       | 3.600001  | -1.700976 | -2.226944 |
| O                       | -0.120941 | -1.192151 | -2.897718 | H                       | 5.056703  | -1.209334 | -1.353443 |
| C                       | -2.685953 | -1.109142 | 0.294511  | C                       | 2.387670  | -2.911652 | 0.149060  |
| C                       | 0.243665  | -0.657777 | -1.933190 | H                       | 1.483224  | -3.335683 | 0.591517  |
| C                       | 3.088649  | 0.862774  | 0.164361  | H                       | 3.249772  | -3.413942 | 0.609514  |
| C                       | 3.172757  | -0.406074 | -0.500894 | H                       | 2.388633  | -3.169503 | -0.913889 |
| C                       | 2.496302  | -1.383160 | 0.323418  | C                       | 1.301841  | -1.275274 | 2.702085  |
| C                       | 1.995039  | -0.714796 | 1.482832  | H                       | 2.030480  | -1.372322 | 3.519082  |
| C                       | 2.345324  | 0.681660  | 1.379564  | H                       | 0.887712  | -2.267162 | 2.508814  |
| C                       | 3.772091  | 2.130467  | -0.267594 | H                       | 0.489890  | -0.638106 | 3.066118  |
| H                       | 4.776382  | 2.196285  | 0.173828  | C                       | 2.181826  | 1.741455  | 2.393314  |
| H                       | 3.215616  | 3.018020  | 0.046610  | H                       | 1.212009  | 1.634975  | 2.888293  |
| H                       | 3.883892  | 2.177200  | -1.354126 | H                       | 2.226050  | 2.742288  | 1.955801  |
| C                       | 3.969969  | -0.706753 | -1.739919 | H                       | 2.955775  | 1.683142  | 3.171472  |
| H                       | 4.017730  | 0.158080  | -2.407732 | H                       | -4.180772 | -2.033719 | -1.794895 |
| H                       | 3.537100  | -1.536237 | -2.306944 | H                       | -4.961611 | -1.728285 | 1.470535  |
| H                       | 5.001973  | -0.986141 | -1.484454 | H                       | -4.710360 | 0.203783  | -1.134331 |
| C                       | 2.464669  | -2.863667 | 0.064480  | H                       | -4.165969 | 0.490923  | 1.966362  |
| H                       | 1.610602  | -3.341535 | 0.551388  | H                       | -2.769554 | -0.228815 | -2.500986 |
| H                       | 3.376276  | -3.345056 | 0.445672  | H                       | -3.093711 | -1.431233 | 2.950311  |
| H                       | 2.400690  | -3.084863 | -1.005115 | Si                      | -1.833131 | -2.790481 | 0.185794  |
| C                       | 1.388489  | -1.358335 | 2.697041  | H                       | -0.951156 | -3.044267 | 1.356822  |
| H                       | 2.155803  | -1.510291 | 3.469616  | H                       | -2.935696 | -3.785803 | 0.252080  |
| H                       | 0.954100  | -2.335089 | 2.468724  | H                       | -1.046600 | -3.063618 | -1.041558 |
| H                       | 0.601480  | -0.739445 | 3.138826  | C                       | -2.001610 | 3.014571  | -0.095549 |
| C                       | 2.138834  | 1.703902  | 2.460544  | H                       | 1.340224  | 1.313380  | -1.670007 |
| H                       | 1.172308  | 1.574748  | 2.959152  | C                       | -1.157537 | 3.613402  | 0.758951  |
| H                       | 2.180429  | 2.724040  | 2.067866  | H                       | -1.040977 | 4.691023  | 0.742919  |
| H                       | 2.915852  | 1.619780  | 3.233619  | H                       | -0.591843 | 3.063817  | 1.502924  |
| H                       | -4.310641 | -2.066207 | -1.765819 | H                       | 0.303098  | 1.667478  | -0.438009 |
| H                       | -5.124142 | -1.786437 | 1.519395  | C                       | -2.834817 | 3.751228  | -1.107996 |
| H                       | -4.775170 | 0.184393  | -1.095295 | H                       | -2.583757 | 3.419288  | -2.122936 |
| H                       | -4.315065 | 0.427937  | 2.003710  | H                       | -3.898510 | 3.534147  | -0.952039 |
| H                       | -2.826102 | -0.297253 | -2.422425 | H                       | -2.682183 | 4.831681  | -1.040790 |
| H                       | -3.269509 | -1.492493 | 3.018081  |                         |           |           |           |
| Si                      | -1.978119 | -2.882027 | 0.259787  | <b>TS<sub>24a</sub></b> |           |           |           |
| H                       | -1.078592 | -3.121571 | 1.421045  | SCF done: -850.701736   |           |           |           |
| H                       | -3.083198 | -3.873447 | 0.350162  | Ru                      | 1.103260  | 0.047590  | -0.519450 |
| H                       | -1.211722 | -3.157704 | -0.979434 | Si                      | -1.188212 | 0.353394  | -0.177730 |
| C                       | -1.689520 | 2.816091  | -0.248623 | H                       | -1.505305 | 1.600620  | 0.828187  |
| H                       | 0.923928  | 1.433249  | -1.493830 | Si                      | -3.405661 | -0.601719 | 1.929967  |
| C                       | -0.491328 | 3.152453  | 0.365929  | Si                      | -3.973014 | -0.866963 | -1.159038 |
| H                       | -0.021813 | 4.097223  | 0.104363  | O                       | -2.099453 | 1.536459  | -1.353332 |
| H                       | -0.308448 | 2.816202  | 1.383635  | O                       | 0.652297  | -1.716466 | -2.942731 |
| H                       | 0.239838  | 1.974819  | -0.199386 | C                       | -2.623278 | -0.892401 | 0.208440  |
| C                       | -2.290723 | 3.580092  | -1.389937 |                         |           |           |           |

|    |           |           |           |                       |           |           |           |
|----|-----------|-----------|-----------|-----------------------|-----------|-----------|-----------|
| C  | 0.778886  | -1.038177 | -2.004193 | C                     | 3.149241  | -0.789419 | -2.467829 |
| C  | 3.081405  | 1.007304  | 0.208683  | H                     | 2.382709  | -1.355932 | -3.004103 |
| C  | 3.340013  | -0.352194 | -0.165383 | H                     | 4.109641  | -1.300485 | -2.627814 |
| C  | 2.625837  | -1.213528 | 0.757473  | H                     | 3.222497  | 0.195167  | -2.938884 |
| C  | 1.908150  | -0.384812 | 1.662941  | C                     | 1.676808  | -2.994916 | -0.693174 |
| C  | 2.169599  | 0.998810  | 1.314138  | H                     | 2.478771  | -3.741115 | -0.594735 |
| C  | 3.739898  | 2.221361  | -0.385291 | H                     | 1.381500  | -2.968665 | -1.745144 |
| H  | 4.680728  | 2.445886  | 0.137358  | H                     | 0.822446  | -3.357666 | -0.116975 |
| H  | 3.101588  | 3.106181  | -0.308529 | C                     | 1.776254  | -2.037074 | 2.360226  |
| H  | 3.975112  | 2.075286  | -1.442993 | H                     | 0.951733  | -2.713922 | 2.123174  |
| C  | 4.333496  | -0.813328 | -1.195693 | H                     | 1.456557  | -1.401570 | 3.191200  |
| H  | 4.442803  | -0.085304 | -2.004752 | H                     | 2.612133  | -2.653871 | 2.721947  |
| H  | 4.035092  | -1.764075 | -1.647895 | H                     | -5.247938 | -1.726983 | -0.243440 |
| H  | 5.326199  | -0.960494 | -0.746354 | H                     | -3.482393 | -3.470032 | 1.272519  |
| C  | 2.742379  | -2.711124 | 0.815785  | H                     | -4.644755 | 0.019335  | 1.276685  |
| H  | 1.862899  | -3.166616 | 1.279930  | H                     | -2.257722 | -1.872853 | 2.594994  |
| H  | 3.620541  | -3.014532 | 1.404053  | H                     | -4.625196 | 0.407541  | -1.126143 |
| H  | 2.852428  | -3.147812 | -0.181528 | H                     | -1.094312 | -3.347427 | 1.095593  |
| C  | 1.173589  | -0.841073 | 2.892599  | Si                    | -2.319591 | -2.126086 | -1.833801 |
| H  | 1.848420  | -0.855048 | 3.761095  | H                     | -0.948751 | -2.658374 | -2.011775 |
| H  | 0.772299  | -1.850989 | 2.775070  | H                     | -3.273454 | -3.262463 | -1.935570 |
| H  | 0.339468  | -0.178750 | 3.143124  | H                     | -2.604402 | -1.181231 | -2.944426 |
| C  | 1.750939  | 2.191198  | 2.129384  | C                     | -2.055771 | 2.822434  | 0.474647  |
| H  | 0.743128  | 2.070525  | 2.539218  | H                     | 0.616943  | 1.451652  | 1.188899  |
| H  | 1.757990  | 3.109770  | 1.534843  | C                     | -2.748194 | 3.190376  | 1.785001  |
| H  | 2.431236  | 2.347728  | 2.979557  | H                     | -2.367843 | 2.577070  | 2.608754  |
| H  | -4.809768 | -2.089773 | -1.014943 | H                     | -2.567325 | 4.243756  | 2.028427  |
| H  | -4.375868 | -1.679974 | 2.257622  | H                     | -3.829760 | 3.033048  | 1.707838  |
| H  | -4.883025 | 0.298413  | -1.034141 | C                     | -2.552758 | 3.645102  | -0.711357 |
| H  | -4.131046 | 0.692423  | 1.999777  | H                     | -2.023001 | 3.365883  | -1.627187 |
| H  | -3.374254 | -0.879047 | -2.513926 | H                     | -3.626000 | 3.486716  | -0.865341 |
| H  | -2.359547 | -0.590320 | 2.986055  | H                     | -2.381574 | 4.712625  | -0.530780 |
| Si | -1.876163 | -2.673502 | 0.221360  |                       |           |           |           |
| H  | -0.823514 | -2.822377 | 1.254572  |                       |           |           |           |
| H  | -2.968651 | -3.625223 | 0.559439  | <b>5b</b>             |           |           |           |
| H  | -1.329876 | -3.045265 | -1.103086 | SCF done: -850.735512 |           |           |           |
| C  | -2.135718 | 2.527973  | -0.493396 | Ru                    | -0.788157 | 0.121589  | 0.146193  |
| H  | 0.936291  | 1.256611  | -1.573142 | Si                    | 1.387464  | -0.958292 | -0.346980 |
| C  | -3.464746 | 2.959754  | 0.062910  | H                     | 1.459767  | -2.276188 | 0.368879  |
| H  | -4.132795 | 2.115285  | 0.223839  | Si                    | 4.372432  | -1.618383 | -0.655547 |
| H  | -3.351724 | 3.537616  | 0.983574  | Si                    | 3.498534  | 1.279207  | -1.276370 |
| H  | -3.924504 | 3.613717  | -0.693994 | O                     | 0.188502  | 1.554651  | -1.169936 |
| C  | -1.037691 | 3.552637  | -0.572896 | O                     | 0.134374  | 0.702980  | 2.956086  |
| H  | -0.064106 | 3.058002  | -0.647656 | C                     | 3.168631  | -0.216648 | -0.126697 |
| H  | -1.191322 | 4.111829  | -1.507134 | C                     | -0.144604 | 0.521613  | 1.840570  |
| H  | -1.062289 | 4.251255  | 0.267286  | C                     | -3.168471 | -0.018419 | -0.260821 |
|    |           |           |           | C                     | -2.792353 | -0.676007 | 0.944050  |
|    |           |           |           | C                     | -1.892222 | -1.762092 | 0.604766  |
|    |           |           |           | C                     | -1.772559 | -1.791502 | -0.836982 |
|    |           |           |           | C                     | -2.500700 | -0.685047 | -1.355740 |
|    |           |           |           | C                     | -4.239416 | 1.028100  | -0.374870 |
|    |           |           |           | H                     | -5.231113 | 0.554167  | -0.376266 |
|    |           |           |           | H                     | -4.159671 | 1.606601  | -1.297690 |
|    |           |           |           | H                     | -4.218993 | 1.730799  | 0.464111  |
|    |           |           |           | C                     | -3.356390 | -0.401299 | 2.310592  |
|    |           |           |           | H                     | -3.631566 | 0.650790  | 2.430223  |
|    |           |           |           | H                     | -2.645466 | -0.650149 | 3.102952  |
|    |           |           |           | H                     | -4.261030 | -1.001787 | 2.479338  |
|    |           |           |           | C                     | -1.447470 | -2.850601 | 1.541584  |
|    |           |           |           | H                     | -0.482852 | -3.270445 | 1.244284  |
|    |           |           |           | H                     | -2.180065 | -3.669634 | 1.556100  |
|    |           |           |           | H                     | -1.344125 | -2.481952 | 2.566273  |
|    |           |           |           | C                     | -1.141913 | -2.882814 | -1.651039 |
|    |           |           |           | H                     | -1.891039 | -3.652507 | -1.885086 |
|    |           |           |           | H                     | -0.323067 | -3.375596 | -1.120170 |
|    |           |           |           | H                     | -0.745885 | -2.507757 | -2.598656 |
|    |           |           |           | C                     | -2.653438 | -0.362616 | -2.815562 |
|    |           |           |           | H                     | -1.715579 | -0.513686 | -3.358255 |
|    |           |           |           | H                     | -2.962557 | 0.673951  | -2.975345 |
|    |           |           |           | H                     | -3.414588 | -1.004801 | -3.280122 |
|    |           |           |           | H                     | 4.971798  | 1.458774  | -1.426470 |
|    |           |           |           | H                     | 5.784868  | -1.163115 | -0.548538 |

  

|                       |           |           |           |  |  |  |  |
|-----------------------|-----------|-----------|-----------|--|--|--|--|
| <b>4a</b>             |           |           |           |  |  |  |  |
| SCF done: -850.779005 |           |           |           |  |  |  |  |
| Ru                    | 1.043397  | 0.438963  | 0.003934  |  |  |  |  |
| Si                    | -1.240059 | 0.158267  | 0.028866  |  |  |  |  |
| H                     | -0.974660 | 2.959398  | 0.590024  |  |  |  |  |
| Si                    | -2.326139 | -2.536809 | 1.267222  |  |  |  |  |
| Si                    | -4.333018 | -0.565705 | -0.049101 |  |  |  |  |
| O                     | -2.323188 | 1.430428  | 0.208412  |  |  |  |  |
| O                     | 0.748327  | 2.776726  | -1.902955 |  |  |  |  |
| C                     | -2.533482 | -1.250416 | -0.138411 |  |  |  |  |
| C                     | 0.812251  | 1.874713  | -1.169509 |  |  |  |  |
| C                     | 2.952793  | -0.002207 | 1.223001  |  |  |  |  |
| C                     | 3.339971  | 0.343475  | -0.108919 |  |  |  |  |
| C                     | 2.838938  | -0.683999 | -1.000410 |  |  |  |  |
| C                     | 2.155075  | -1.655552 | -0.211331 |  |  |  |  |
| C                     | 2.195570  | -1.224168 | 1.165962  |  |  |  |  |
| C                     | 3.371088  | 0.711026  | 2.478544  |  |  |  |  |
| H                     | 4.321178  | 0.305191  | 2.854331  |  |  |  |  |
| H                     | 2.626851  | 0.598875  | 3.271533  |  |  |  |  |
| H                     | 3.512646  | 1.781517  | 2.306835  |  |  |  |  |
| C                     | 4.244760  | 1.477758  | -0.503150 |  |  |  |  |
| H                     | 4.157681  | 2.321149  | 0.187658  |  |  |  |  |
| H                     | 4.017715  | 1.848838  | -1.506974 |  |  |  |  |
| H                     | 5.295526  | 1.155099  | -0.502257 |  |  |  |  |

|    |           |           |           |   |           |          |          |
|----|-----------|-----------|-----------|---|-----------|----------|----------|
| H  | 2.938023  | 1.057687  | -2.632334 | C | 0.658240  | 2.577962 | 1.390444 |
| H  | 4.128078  | -2.027609 | -2.063810 | H | 1.348772  | 3.370248 | 1.065309 |
| H  | 2.973552  | 2.552759  | -0.727871 | H | -0.077187 | 3.031382 | 2.064013 |
| H  | 4.211535  | -2.817064 | 0.208961  | H | 1.231351  | 1.845225 | 1.960379 |
| Si | 3.577628  | 0.244818  | 1.679335  |   |           |          |          |
| H  | 3.212169  | -0.857428 | 2.607774  |   |           |          |          |
| H  | 5.035955  | 0.503289  | 1.832969  |   |           |          |          |
| H  | 2.865334  | 1.475144  | 2.104652  |   |           |          |          |
| H  | 1.334778  | -1.302564 | -1.803128 |   |           |          |          |
| C  | -0.453537 | 2.395457  | -0.444233 |   |           |          |          |
| C  | 0.279636  | 3.215805  | 0.605609  |   |           |          |          |
| H  | 0.632111  | 4.143001  | 0.129464  |   |           |          |          |
| H  | -0.379240 | 3.501798  | 1.431540  |   |           |          |          |
| H  | 1.147940  | 2.688396  | 0.999293  |   |           |          |          |
| C  | -1.683664 | 3.070917  | -1.019892 |   |           |          |          |
| H  | -2.429406 | 3.305947  | -0.255027 |   |           |          |          |
| H  | -1.366784 | 4.024603  | -1.469023 |   |           |          |          |
| H  | -2.131001 | 2.461632  | -1.804825 |   |           |          |          |

**TS<sub>56b</sub>**

SCF done: -850.708927

|    |           |           |           |
|----|-----------|-----------|-----------|
| Ru | -0.994938 | 0.067814  | 0.305787  |
| Si | 1.466217  | -0.657877 | -0.383864 |
| H  | 1.456752  | -1.913026 | 0.445614  |
| Si | 4.311358  | -1.510588 | -1.128634 |
| Si | 3.722233  | 1.522482  | -1.069006 |
| O  | 0.699512  | 1.076955  | -0.582084 |
| O  | -0.130206 | -0.412134 | 3.157102  |
| C  | 3.317166  | -0.139533 | -0.215770 |
| C  | -0.390258 | -0.172883 | 2.046123  |
| C  | -3.210865 | 0.378453  | -0.499635 |
| C  | -3.157282 | -0.422749 | 0.691056  |
| C  | -2.478270 | -1.669156 | 0.361573  |
| C  | -2.056619 | -1.589178 | -0.993273 |
| C  | -2.486108 | -0.309078 | -1.517334 |
| C  | -3.969428 | 1.666273  | -0.641646 |
| H  | -5.025881 | 1.468354  | -0.870993 |
| H  | -3.574499 | 2.291604  | -1.446501 |
| H  | -3.940979 | 2.254446  | 0.280751  |
| C  | -3.907921 | -0.151793 | 1.965860  |
| H  | -3.980321 | 0.920759  | 2.169563  |
| H  | -3.421538 | -0.617426 | 2.827578  |
| H  | -4.931318 | -0.549029 | 1.908723  |
| C  | -2.368706 | -2.869775 | 1.259360  |
| H  | -1.486181 | -3.471317 | 1.022825  |
| H  | -3.250684 | -3.516377 | 1.150085  |
| H  | -2.300411 | -2.584476 | 2.313039  |
| C  | -1.413894 | -2.686289 | -1.792851 |
| H  | -2.176480 | -3.310396 | -2.280187 |
| H  | -0.806301 | -3.343471 | -1.163480 |
| H  | -0.765561 | -2.289821 | -2.579833 |
| C  | -2.300110 | 0.129928  | -2.943158 |
| H  | -1.276233 | -0.044033 | -3.290878 |
| H  | -2.518014 | 1.193637  | -3.073322 |
| H  | -2.971159 | -0.424985 | -3.613343 |
| H  | 5.197180  | 1.638257  | -1.245319 |
| H  | 5.748004  | -1.444033 | -0.754600 |
| H  | 3.103164  | 1.603144  | -2.416044 |
| H  | 4.204435  | -1.344554 | -2.601921 |
| H  | 3.289103  | 2.694061  | -0.267891 |
| H  | 3.804959  | -2.863613 | -0.778753 |
| Si | 3.915955  | -0.123946 | 1.601369  |
| H  | 3.816343  | -1.482727 | 2.195739  |
| H  | 5.337041  | 0.308762  | 1.673326  |
| H  | 3.118700  | 0.806119  | 2.439390  |
| H  | 1.239760  | -1.054607 | -1.795190 |
| C  | -0.049140 | 1.963260  | 0.197886  |
| C  | -0.724295 | 2.995782  | -0.685142 |
| H  | -1.527538 | 3.500470  | -0.137582 |
| H  | -0.000632 | 3.763710  | -0.999049 |
| H  | -1.142060 | 2.539787  | -1.585337 |

**6b**

SCF done: -850.733596

|    |           |           |           |
|----|-----------|-----------|-----------|
| Ru | -1.158558 | -0.270880 | -0.273078 |
| Si | 2.373372  | -1.157216 | -0.553882 |
| H  | 3.015444  | -2.441000 | -0.165806 |
| Si | 3.137269  | 1.852896  | -1.081737 |
| Si | 3.254794  | 0.678176  | 1.827032  |
| O  | 0.891581  | -1.036054 | 0.299293  |
| O  | -1.170568 | -0.925212 | -3.223480 |
| C  | 3.486608  | 0.284776  | -0.034307 |
| C  | -1.075680 | -0.737716 | -2.074043 |
| C  | -3.005251 | 0.001406  | 1.096335  |
| C  | -3.292078 | 0.325878  | -0.280510 |
| C  | -2.575610 | 1.552999  | -0.610072 |
| C  | -1.768475 | 1.885296  | 0.499058  |
| C  | -2.025567 | 0.921437  | 1.561131  |
| C  | -3.694771 | -1.064447 | 1.898631  |
| H  | -4.620153 | -0.672918 | 2.344996  |
| H  | -3.068101 | -1.432189 | 2.715812  |
| H  | -3.969353 | -1.922404 | 1.277715  |
| C  | -4.385129 | -0.286579 | -1.112697 |
| H  | -4.517363 | -1.347559 | -0.881501 |
| H  | -4.168754 | -0.208959 | -2.182061 |
| H  | -5.345884 | 0.216760  | -0.931426 |
| C  | -2.720718 | 2.326642  | -1.890055 |
| H  | -1.834982 | 2.934843  | -2.095673 |
| H  | -3.585581 | 3.003754  | -1.843072 |
| H  | -2.870530 | 1.665209  | -2.748521 |
| C  | -0.880030 | 3.088036  | 0.638352  |
| H  | -1.399455 | 3.897763  | 1.171122  |
| H  | -0.571434 | 3.479044  | -0.335265 |
| H  | 0.026405  | 2.856463  | 1.206583  |
| C  | -1.476085 | 1.033721  | 2.956186  |
| H  | -0.400501 | 1.241674  | 2.955287  |
| H  | -1.636355 | 0.117274  | 3.531333  |
| H  | -1.963942 | 1.851356  | 3.506157  |
| H  | 4.398269  | 1.506689  | 2.294885  |
| H  | 3.866566  | 3.013829  | -0.506639 |
| H  | 2.008983  | 1.444098  | 2.074503  |
| H  | 1.690506  | 2.171176  | -1.112624 |
| H  | 3.227180  | -0.567456 | 2.634472  |
| H  | 3.611702  | 1.651593  | -2.475809 |
| Si | 5.308085  | -0.247530 | -0.323105 |
| H  | 5.455224  | -0.896876 | -1.652394 |
| H  | 6.201504  | 0.937415  | -0.279016 |
| H  | 5.744962  | -1.213432 | 0.717352  |
| C  | 2.153193  | -1.140898 | -2.021942 |
| C  | -0.205284 | -2.015998 | 0.364519  |
| C  | -0.377767 | -2.426280 | 1.816534  |
| H  | -1.313180 | -2.983594 | 1.938015  |
| H  | 0.444941  | -3.080897 | 2.147280  |
| H  | -0.403749 | -1.557424 | 2.478606  |
| C  | -0.011700 | -3.226980 | -0.533309 |
| H  | 0.765134  | -3.908981 | -0.150663 |
| H  | -0.950358 | -3.790950 | -0.569439 |
| H  | 0.234029  | -2.956280 | -1.564165 |

**2c**

SCF done: -1042.476951

|    |           |           |           |
|----|-----------|-----------|-----------|
| Ru | -1.420721 | -0.468798 | -0.452994 |
| Si | 0.222419  | 0.823132  | 0.611813  |
| H  | 0.271660  | 0.728713  | 2.122346  |
| Si | 1.732744  | 3.341467  | 1.769400  |
| Si | 1.818567  | 2.840087  | -1.299126 |
| O  | 2.053184  | 0.123526  | 0.373755  |
| O  | -1.153356 | 0.990492  | -3.088635 |

|    |           |           |           |                        |           |           |           |
|----|-----------|-----------|-----------|------------------------|-----------|-----------|-----------|
| C  | 0.753814  | 2.653939  | 0.280551  | C                      | -2.287857 | -3.835208 | 0.159073  |
| C  | -1.221032 | 0.448512  | -2.057317 | H                      | -3.156184 | -4.420708 | 0.492138  |
| C  | -2.622963 | -2.372293 | 0.162983  | H                      | -1.451035 | -4.081104 | 0.818839  |
| C  | -3.420251 | -1.597641 | -0.739605 | H                      | -2.025617 | -4.172797 | -0.847123 |
| C  | -3.725197 | -0.338458 | -0.092923 | C                      | -3.590211 | -2.149472 | -2.230155 |
| C  | -3.102838 | -0.338309 | 1.189593  | H                      | -2.931391 | -2.959326 | -2.556190 |
| C  | -2.402721 | -1.595362 | 1.348546  | H                      | -3.568011 | -1.376260 | -3.003713 |
| C  | -2.196307 | -3.798087 | -0.053796 | H                      | -4.613675 | -2.548810 | -2.193501 |
| H  | -2.971416 | -4.494779 | 0.296495  | C                      | -4.188393 | 0.795809  | -1.150382 |
| H  | -1.275197 | -4.034168 | 0.487455  | H                      | -3.939217 | 1.794471  | -0.782509 |
| H  | -2.017324 | -4.007227 | -1.112081 | H                      | -5.274976 | 0.665942  | -1.047393 |
| C  | -3.991742 | -2.070650 | -2.047643 | H                      | -3.956323 | 0.770089  | -2.219116 |
| H  | -3.333517 | -2.795262 | -2.536201 | C                      | -3.286259 | 0.906042  | 1.937436  |
| H  | -4.140209 | -1.241141 | -2.745606 | H                      | -4.177722 | 0.694586  | 2.544910  |
| H  | -4.968088 | -2.555883 | -1.902343 | H                      | -3.454660 | 1.855656  | 1.423677  |
| C  | -4.654880 | 0.713473  | -0.632081 | H                      | -2.448190 | 1.045936  | 2.627564  |
| H  | -4.435407 | 1.700133  | -0.213695 | C                      | -2.086873 | -1.913456 | 2.715669  |
| H  | -5.700699 | 0.476387  | -0.388076 | H                      | -1.581934 | -1.099334 | 3.245842  |
| H  | -4.584651 | 0.795517  | -1.720991 | H                      | -1.412376 | -2.774326 | 2.701974  |
| C  | -3.289771 | 0.686587  | 2.273745  | H                      | -2.964855 | -2.194147 | 3.314691  |
| H  | -4.138817 | 0.418408  | 2.919897  | H                      | 1.919841  | 4.243980  | -1.834458 |
| H  | -3.489684 | 1.680630  | 1.864147  | H                      | 1.681696  | 5.135781  | 1.382759  |
| H  | -2.406933 | 0.765053  | 2.915872  | H                      | 3.386207  | 2.953865  | -0.448833 |
| C  | -1.775669 | -2.072216 | 2.629548  | H                      | 2.237017  | 3.076258  | 2.499344  |
| H  | -1.175390 | -1.289438 | 3.107194  | H                      | 2.016152  | 1.859766  | -2.095446 |
| H  | -1.125430 | -2.937080 | 2.463983  | H                      | 0.009523  | 3.984211  | 2.666902  |
| H  | -2.541708 | -2.380194 | 3.356201  | Si                     | -0.925245 | 3.633832  | -0.528018 |
| H  | 1.622198  | 4.183651  | -1.907035 | H                      | -2.101078 | 3.422284  | 0.357326  |
| H  | 2.326114  | 4.673152  | 1.461960  | H                      | -0.719574 | 5.102575  | -0.640557 |
| H  | 3.268680  | 2.724340  | -0.978374 | H                      | -1.261301 | 3.113033  | -1.876010 |
| H  | 2.845887  | 2.431097  | 2.148644  | C                      | 2.312751  | -0.868329 | 1.001056  |
| H  | 1.505069  | 1.816777  | -2.323181 | H                      | -0.128028 | -1.808866 | -0.926257 |
| H  | 0.850100  | 3.506318  | 2.955681  | C                      | 1.371583  | -1.683807 | 1.620391  |
| Si | -0.837705 | 3.701661  | 0.064138  | H                      | 1.569235  | -2.747343 | 1.712084  |
| H  | -1.800874 | 3.444767  | 1.167561  | H                      | 0.749680  | -1.263512 | 2.406503  |
| H  | -0.484563 | 5.147360  | 0.114802  | H                      | 0.291476  | -1.417883 | 0.572618  |
| H  | -1.513401 | 3.436351  | -1.227770 | C                      | 3.552682  | -1.364949 | 0.380853  |
| C  | 2.543868  | -0.994744 | 0.681149  | C                      | 4.160181  | -0.654336 | -0.670232 |
| C  | 3.874132  | -1.332747 | 0.153807  | C                      | 4.163527  | -2.548847 | 0.835844  |
| C  | 4.596690  | -2.450101 | 0.616613  | C                      | 5.330128  | -1.126249 | -1.260506 |
| C  | 4.452109  | -0.505369 | -0.831347 | H                      | 3.700257  | 0.260525  | -1.022504 |
| C  | 5.861521  | -2.730495 | 0.107499  | C                      | 5.332476  | -3.018184 | 0.242988  |
| H  | 4.185552  | -3.093110 | 1.386455  | H                      | 3.734357  | -3.087713 | 1.674807  |
| C  | 5.710095  | -0.796857 | -1.344194 | C                      | 5.919290  | -2.309857 | -0.809214 |
| H  | 3.898639  | 0.355133  | -1.186937 | H                      | 5.782390  | -0.569589 | -2.076756 |
| C  | 6.418221  | -1.908427 | -0.875364 | H                      | 5.793038  | -3.931738 | 0.609087  |
| H  | 6.412584  | -3.590345 | 0.476547  | H                      | 6.834043  | -2.674368 | -1.268790 |
| H  | 6.141717  | -0.158330 | -2.109119 |                        |           |           |           |
| H  | 7.403242  | -2.132776 | -1.275181 |                        |           |           |           |
| H  | -0.204131 | -1.395524 | -0.993582 | <b>3c</b>              |           |           |           |
| C  | 1.741140  | -1.925704 | 1.527605  | SCF done: -1042.469833 |           |           |           |
| H  | 0.779480  | -2.062884 | 1.006369  | Ru                     | -1.335161 | -0.675743 | -0.420890 |
| H  | 2.210337  | -2.892280 | 1.702284  | Si                     | 0.390735  | 0.764495  | 0.658797  |
| H  | 1.505620  | -1.447568 | 2.485685  | H                      | 0.043285  | 0.799500  | 2.119911  |
|    |           |           |           | Si                     | 1.418850  | 3.505278  | 1.691675  |
|    |           |           |           | Si                     | 2.015655  | 2.716654  | -1.250773 |
|    |           |           |           | O                      | 2.034705  | 0.207442  | 0.563147  |
|    |           |           |           | O                      | -0.586763 | 0.580197  | -3.084728 |
|    |           |           |           | C                      | 0.707280  | 2.598135  | 0.155365  |
|    |           |           |           | C                      | -0.834520 | 0.145522  | -2.041177 |
|    |           |           |           | C                      | -2.907321 | -2.224512 | 0.189416  |
|    |           |           |           | C                      | -3.489595 | -1.324236 | -0.771733 |
|    |           |           |           | C                      | -3.568608 | -0.016891 | -0.161613 |
|    |           |           |           | C                      | -3.024993 | -0.110849 | 1.159079  |
|    |           |           |           | C                      | -2.589430 | -1.469171 | 1.366584  |
|    |           |           |           | C                      | -2.775214 | -3.714852 | 0.041511  |
|    |           |           |           | H                      | -3.661518 | -4.217749 | 0.452270  |
|    |           |           |           | H                      | -1.900300 | -4.097243 | 0.574024  |
|    |           |           |           | H                      | -2.681703 | -4.009991 | -1.006764 |
|    |           |           |           | C                      | -4.094200 | -1.711597 | -2.092691 |
|    |           |           |           | H                      | -3.576214 | -2.565476 | -2.538115 |
|    |           |           |           | H                      | -4.052086 | -0.888917 | -2.812174 |

  

|                         |           |           |           |  |  |  |  |
|-------------------------|-----------|-----------|-----------|--|--|--|--|
| <b>TS<sub>23c</sub></b> |           |           |           |  |  |  |  |
| SCF done: -1042.450484  |           |           |           |  |  |  |  |
| Ru                      | -1.142951 | -0.673432 | -0.381937 |  |  |  |  |
| Si                      | 0.306672  | 0.980747  | 0.698080  |  |  |  |  |
| H                       | -0.071164 | 1.067146  | 2.154261  |  |  |  |  |
| Si                      | 1.168855  | 3.788098  | 1.755310  |  |  |  |  |
| Si                      | 2.051544  | 2.956371  | -1.099711 |  |  |  |  |
| O                       | 2.008332  | 0.400842  | 0.769467  |  |  |  |  |
| O                       | -0.315290 | 0.479205  | -3.061630 |  |  |  |  |
| C                       | 0.640995  | 2.811665  | 0.191426  |  |  |  |  |
| C                       | -0.605461 | 0.074028  | -2.013047 |  |  |  |  |
| C                       | -2.601527 | -2.364979 | 0.185068  |  |  |  |  |
| C                       | -3.177738 | -1.607374 | -0.889720 |  |  |  |  |
| C                       | -3.452006 | -0.275596 | -0.395654 |  |  |  |  |
| C                       | -3.037470 | -0.216258 | 0.970845  |  |  |  |  |
| C                       | -2.495110 | -1.504366 | 1.329597  |  |  |  |  |

|    |           |           |           |
|----|-----------|-----------|-----------|
| H  | -5.150252 | -1.989775 | -1.971155 |
| C  | -4.271666 | 1.172656  | -0.752979 |
| H  | -3.896919 | 2.113222  | -0.342955 |
| H  | -5.348708 | 1.123446  | -0.540270 |
| H  | -4.155364 | 1.214196  | -1.839604 |
| C  | -3.068672 | 0.941338  | 2.228369  |
| H  | -3.905824 | 0.744075  | 2.912554  |
| H  | -3.209028 | 1.941618  | 1.813073  |
| H  | -2.154454 | 0.954379  | 2.830027  |
| C  | -2.078165 | -2.023927 | 2.666390  |
| H  | -1.465514 | -1.293138 | 3.202589  |
| H  | -1.472194 | -2.920975 | 2.513675  |
| H  | -2.914655 | -2.296099 | 3.325290  |
| H  | 1.811664  | 3.996634  | -1.984416 |
| H  | 1.961031  | 4.835138  | 1.300021  |
| H  | 3.394770  | 2.744398  | -0.703707 |
| H  | 2.508841  | 2.726153  | 2.326825  |
| H  | 1.910695  | 1.609973  | -2.227046 |
| H  | 0.351676  | 3.735265  | 2.703098  |
| Si | -0.860602 | 3.533721  | -0.391593 |
| H  | -1.950935 | 3.404864  | 0.611898  |
| H  | -0.563278 | 4.984353  | -0.524413 |
| H  | -1.383309 | 3.054707  | -1.694788 |
| C  | 2.536833  | -0.988377 | 0.985978  |
| C  | 3.821675  | -1.345243 | 0.327514  |
| C  | 4.195006  | -2.686718 | 0.141743  |
| C  | 4.693952  | -0.339521 | -0.117900 |
| C  | 5.412264  | -3.012248 | -0.454152 |
| H  | 3.514752  | -3.477632 | 0.443245  |
| C  | 5.912538  | -0.666514 | -0.712121 |
| H  | 4.414270  | 0.699063  | 0.015686  |
| C  | 6.278393  | -2.003133 | -0.881726 |
| H  | 5.679038  | -4.056400 | -0.596036 |
| H  | 6.577680  | 0.126667  | -1.043784 |
| H  | 7.225735  | -2.257020 | -1.349998 |
| H  | -0.678996 | -1.899515 | -1.224881 |
| C  | 1.956681  | -1.756853 | 1.927392  |
| H  | 2.433577  | -2.669932 | 2.261863  |
| H  | 1.032738  | -1.474280 | 2.417378  |
| H  | 0.046673  | -1.322040 | 0.135516  |

#### TS<sub>24c</sub>

SCF done: -1042.433571

|    |           |           |           |
|----|-----------|-----------|-----------|
| Ru | -1.747734 | -0.157107 | -0.521597 |
| Si | 0.519749  | 0.362704  | -0.256741 |
| H  | 1.319454  | -0.824517 | 0.565784  |
| Si | 2.599065  | 1.768357  | 1.773675  |
| Si | 2.269330  | 2.841524  | -1.169768 |
| O  | 1.741064  | -0.249947 | -1.550209 |
| O  | -2.158806 | 2.132646  | -2.463768 |
| C  | 1.383566  | 1.995853  | 0.312272  |
| C  | -1.957101 | 1.266144  | -1.711469 |
| C  | -3.196114 | -1.904030 | -0.050393 |
| C  | -3.948220 | -0.685141 | -0.099169 |
| C  | -3.519057 | 0.150686  | 1.006510  |
| C  | -2.486364 | -0.536925 | 1.699604  |
| C  | -2.265541 | -1.808119 | 1.035211  |
| C  | -3.419095 | -3.108649 | -0.922104 |
| H  | -4.175942 | -3.772974 | -0.480947 |
| H  | -2.502074 | -3.691317 | -1.048393 |
| H  | -3.767427 | -2.824391 | -1.918780 |
| C  | -5.116571 | -0.400970 | -1.001885 |
| H  | -5.014448 | -0.908145 | -1.965600 |
| H  | -5.220022 | 0.669491  | -1.203479 |
| H  | -6.057545 | -0.741289 | -0.546081 |
| C  | -4.152712 | 1.455358  | 1.401675  |
| H  | -3.469816 | 2.072761  | 1.991931  |
| H  | -5.054766 | 1.288342  | 2.008014  |
| H  | -4.451863 | 2.040162  | 0.526311  |
| C  | -1.859014 | -0.130446 | 3.003800  |
| H  | -2.403506 | -0.575864 | 3.849325  |

|    |           |           |           |
|----|-----------|-----------|-----------|
| H  | -1.870201 | 0.953997  | 3.141254  |
| H  | -0.818929 | -0.463216 | 3.078558  |
| C  | -1.394037 | -2.915373 | 1.560242  |
| H  | -0.462699 | -2.530379 | 1.987859  |
| H  | -1.128509 | -3.628245 | 0.774002  |
| H  | -1.907020 | -3.480379 | 2.352630  |
| H  | 2.359078  | 4.303163  | -0.904730 |
| H  | 3.200940  | 3.076305  | 2.149389  |
| H  | 3.654437  | 2.345353  | -1.357265 |
| H  | 3.700932  | 0.832923  | 1.455320  |
| H  | 1.514719  | 2.651444  | -2.431638 |
| H  | 1.874411  | 1.247473  | 2.964265  |
| Si | 0.015163  | 3.216061  | 0.913957  |
| H  | -0.799798 | 2.631761  | 2.005103  |
| H  | 0.690741  | 4.422879  | 1.463533  |
| H  | -0.868712 | 3.646827  | -0.192897 |
| C  | 2.144633  | -1.289951 | -0.830941 |
| H  | -1.224967 | -0.956815 | -1.821235 |
| C  | 1.417773  | -2.588145 | -1.073793 |
| H  | 0.337010  | -2.418139 | -1.079945 |
| H  | 1.707658  | -2.918728 | -2.081044 |
| H  | 1.690416  | -3.368664 | -0.360970 |
| C  | 3.561493  | -1.346888 | -0.394141 |
| C  | 4.508401  | -0.552582 | -1.059208 |
| C  | 3.990179  | -2.231860 | 0.610808  |
| C  | 5.859188  | -0.643838 | -0.726400 |
| H  | 4.174429  | 0.115835  | -1.843545 |
| C  | 5.336097  | -2.304094 | 0.954697  |
| H  | 3.264878  | -2.837738 | 1.146096  |
| C  | 6.275070  | -1.512948 | 0.283605  |
| H  | 6.585794  | -0.033012 | -1.254515 |
| H  | 5.655937  | -2.976438 | 1.745689  |
| H  | 7.326749  | -1.576408 | 0.549036  |

#### 4c

SCF done: -1042.5066505

|    |           |           |           |
|----|-----------|-----------|-----------|
| Ru | -1.525576 | -0.358417 | -0.482633 |
| Si | 0.315488  | 0.981642  | -0.268533 |
| H  | 1.490149  | -1.350175 | -1.234445 |
| Si | 1.788551  | 2.881061  | 1.745852  |
| Si | 1.313031  | 3.787576  | -1.213647 |
| O  | 1.901420  | 0.599011  | -0.671191 |
| O  | -3.000704 | 1.602181  | -2.274632 |
| C  | 0.573267  | 2.795312  | 0.260141  |
| C  | -2.394886 | 0.884647  | -1.587753 |
| C  | -2.107533 | -2.568649 | -0.058440 |
| C  | -3.298678 | -1.774714 | -0.053188 |
| C  | -3.215768 | -0.850461 | 1.063834  |
| C  | -1.969729 | -1.062374 | 1.715664  |
| C  | -1.261041 | -2.113761 | 1.006556  |
| C  | -1.836182 | -3.741611 | -0.958326 |
| H  | -2.231436 | -4.667137 | -0.516060 |
| H  | -0.764329 | -3.885099 | -1.120050 |
| H  | -2.304476 | -3.616075 | -1.938240 |
| C  | -4.507015 | -1.985199 | -0.922742 |
| H  | -4.232799 | -2.384831 | -1.903209 |
| H  | -5.054216 | -1.052390 | -1.088020 |
| H  | -5.204109 | -2.696837 | -0.457740 |
| C  | -4.315382 | 0.066660  | 1.522396  |
| H  | -3.919106 | 0.928924  | 2.066605  |
| H  | -5.008942 | -0.458857 | 2.194441  |
| H  | -4.903072 | 0.448037  | 0.682061  |
| C  | -1.533734 | -0.442557 | 3.014288  |
| H  | -1.911070 | -1.027701 | 3.865494  |
| H  | -1.909995 | 0.578123  | 3.125344  |
| H  | -0.444010 | -0.407512 | 3.102582  |
| C  | -0.006395 | -2.794073 | 1.483624  |
| C  | 0.680638  | -2.097339 | 1.972302  |
| H  | 0.539726  | -3.263956 | 0.660666  |
| H  | -0.243047 | -3.584432 | 2.211182  |
| H  | 1.057653  | 5.239486  | -1.016252 |

|                        |           |           |           |                         |           |           |           |
|------------------------|-----------|-----------|-----------|-------------------------|-----------|-----------|-----------|
| H                      | 1.780274  | 4.253400  | 2.318462  | H                       | -2.831392 | -1.610199 | 2.434509  |
| H                      | 2.776257  | 3.583997  | -1.336139 | H                       | -2.036243 | 0.457248  | -2.078846 |
| H                      | 3.176061  | 2.546195  | 1.351071  | C                       | 0.897144  | -1.676535 | 0.414284  |
| H                      | 0.667430  | 3.380759  | -2.488970 | C                       | 2.342611  | -1.927393 | 0.108685  |
| H                      | 1.362017  | 1.941306  | 2.818034  | C                       | 3.311499  | -2.063019 | 1.117382  |
| Si                     | -1.096193 | 3.586230  | 0.780228  | C                       | 2.720707  | -2.169683 | -1.223205 |
| H                      | -1.744922 | 2.805514  | 1.864127  | C                       | 4.623753  | -2.414074 | 0.801164  |
| H                      | -0.837178 | 4.956393  | 1.295273  | H                       | 3.043286  | -1.887049 | 2.154846  |
| H                      | -2.030161 | 3.689217  | -0.365392 | C                       | 4.031462  | -2.527944 | -1.537255 |
| C                      | 2.328163  | -0.643974 | -1.260099 | H                       | 1.962561  | -2.097443 | -1.995852 |
| H                      | -0.728732 | -0.839896 | -1.808862 | C                       | 4.989438  | -2.649449 | -0.526503 |
| C                      | 2.703520  | -0.372885 | -2.719959 | H                       | 5.360959  | -2.509250 | 1.594091  |
| H                      | 1.831701  | -0.006971 | -3.273257 | H                       | 4.302956  | -2.726847 | -2.570898 |
| H                      | 3.499363  | 0.377188  | -2.773768 | H                       | 6.009567  | -2.933305 | -0.770320 |
| H                      | 3.060551  | -1.291107 | -3.198905 | C                       | 0.357941  | -2.373262 | 1.658286  |
| C                      | 3.489032  | -1.217515 | -0.467501 | H                       | 0.502981  | -3.455836 | 1.536589  |
| C                      | 4.450360  | -0.387528 | 0.122655  | H                       | 0.873095  | -2.074934 | 2.575049  |
| C                      | 3.639461  | -2.605976 | -0.364389 | H                       | -0.707917 | -2.182418 | 1.774564  |
| C                      | 5.537078  | -0.937734 | 0.804002  |                         |           |           |           |
| H                      | 4.336950  | 0.689540  | 0.053181  |                         |           |           |           |
| C                      | 4.729153  | -3.158265 | 0.311374  |                         |           |           |           |
| H                      | 2.898693  | -3.261156 | -0.818861 |                         |           |           |           |
| C                      | 5.681370  | -2.323830 | 0.899493  |                         |           |           |           |
| H                      | 6.273233  | -0.281657 | 1.261397  |                         |           |           |           |
| H                      | 4.829650  | -4.238119 | 0.383427  |                         |           |           |           |
| H                      | 6.528201  | -2.750195 | 1.430590  |                         |           |           |           |
| <b>5d</b>              |           |           |           |                         |           |           |           |
| SCF done: -1042.470738 |           |           |           |                         |           |           |           |
| Ru                     | 0.198753  | 0.598715  | 0.237430  |                         |           |           |           |
| Si                     | -2.138812 | 0.468956  | -0.585001 |                         |           |           |           |
| H                      | -2.848879 | 1.747519  | -0.246499 |                         |           |           |           |
| Si                     | -5.031111 | -0.370594 | -1.190604 |                         |           |           |           |
| Si                     | -2.948518 | -2.627366 | -0.895896 |                         |           |           |           |
| O                      | 0.094346  | -1.425459 | -0.560157 |                         |           |           |           |
| O                      | -0.838662 | 0.504862  | 3.064928  |                         |           |           |           |
| C                      | -3.459202 | -0.907297 | -0.222787 |                         |           |           |           |
| C                      | -0.484479 | 0.459352  | 1.956759  |                         |           |           |           |
| C                      | 2.337357  | 1.638313  | -0.227998 |                         |           |           |           |
| C                      | 1.607330  | 2.339815  | 0.771433  |                         |           |           |           |
| C                      | 0.373282  | 2.816932  | 0.174417  |                         |           |           |           |
| C                      | 0.399361  | 2.453529  | -1.226813 |                         |           |           |           |
| C                      | 1.567094  | 1.675175  | -1.450990 |                         |           |           |           |
| C                      | 3.742201  | 1.132136  | -0.100388 |                         |           |           |           |
| H                      | 4.452021  | 1.926380  | -0.373700 |                         |           |           |           |
| H                      | 3.933959  | 0.281188  | -0.756922 |                         |           |           |           |
| H                      | 3.975620  | 0.821805  | 0.921106  |                         |           |           |           |
| C                      | 2.091916  | 2.672163  | 2.155612  |                         |           |           |           |
| H                      | 2.802829  | 1.927001  | 2.524111  |                         |           |           |           |
| H                      | 1.269230  | 2.730553  | 2.873504  |                         |           |           |           |
| H                      | 2.601687  | 3.645576  | 2.159839  |                         |           |           |           |
| C                      | -0.579967 | 3.794104  | 0.805142  |                         |           |           |           |
| H                      | -1.597372 | 3.668433  | 0.425025  |                         |           |           |           |
| H                      | -0.268835 | 4.827187  | 0.596368  |                         |           |           |           |
| H                      | -0.617244 | 3.673347  | 1.891666  |                         |           |           |           |
| C                      | -0.539695 | 2.957468  | -2.283014 |                         |           |           |           |
| H                      | -0.149074 | 3.892874  | -2.708289 |                         |           |           |           |
| H                      | -1.534611 | 3.171644  | -1.884282 |                         |           |           |           |
| H                      | -0.656224 | 2.244608  | -3.103646 |                         |           |           |           |
| C                      | 2.010447  | 1.129938  | -2.778456 |                         |           |           |           |
| H                      | 1.156880  | 0.878123  | -3.414474 |                         |           |           |           |
| H                      | 2.618069  | 0.229687  | -2.660992 |                         |           |           |           |
| H                      | 2.618037  | 1.870598  | -3.317654 |                         |           |           |           |
| H                      | -4.176844 | -3.451343 | -1.091056 |                         |           |           |           |
| H                      | -6.145032 | -1.326574 | -0.947948 |                         |           |           |           |
| H                      | -2.273579 | -2.520091 | -2.212420 |                         |           |           |           |
| H                      | -4.767313 | -0.335918 | -2.653396 |                         |           |           |           |
| H                      | -2.084524 | -3.379215 | 0.045793  |                         |           |           |           |
| H                      | -5.486832 | 0.980489  | -0.770101 |                         |           |           |           |
| Si                     | -3.933774 | -1.041090 | 1.620493  |                         |           |           |           |
| H                      | -4.289339 | 0.291262  | 2.176904  |                         |           |           |           |
| H                      | -5.113288 | -1.934097 | 1.787825  |                         |           |           |           |
|                        |           |           |           | <b>TS<sub>56d</sub></b> |           |           |           |
|                        |           |           |           | SCF done: -1042.443674  |           |           |           |
| Ru                     | 0.529350  | -0.870018 | -0.335657 |                         |           |           |           |
| Si                     | -1.918362 | -0.308932 | 0.544289  |                         |           |           |           |
| H                      | -2.501237 | -1.636811 | 0.148822  |                         |           |           |           |
| Si                     | -4.705840 | 0.333754  | 1.632761  |                         |           |           |           |
| Si                     | -3.048320 | 2.699498  | 0.536384  |                         |           |           |           |
| O                      | -0.539822 | 0.948654  | 0.141211  |                         |           |           |           |
| O                      | -0.796590 | -1.856404 | -2.861614 |                         |           |           |           |
| C                      | -3.440770 | 0.845752  | 0.276143  |                         |           |           |           |
| C                      | -0.331288 | -1.395589 | -1.897270 |                         |           |           |           |
| C                      | 2.754823  | -1.188494 | 0.479936  |                         |           |           |           |
| C                      | 2.368126  | -2.174044 | -0.488082 |                         |           |           |           |
| C                      | 1.284892  | -2.960467 | 0.087646  |                         |           |           |           |
| C                      | 0.980424  | -2.417468 | 1.369706  |                         |           |           |           |
| C                      | 1.869992  | -1.300339 | 1.594272  |                         |           |           |           |
| C                      | 3.926645  | -0.260225 | 0.363812  |                         |           |           |           |
| H                      | 4.831159  | -0.734041 | 0.771221  |                         |           |           |           |
| H                      | 3.766341  | 0.673090  | 0.908950  |                         |           |           |           |
| H                      | 4.133546  | 0.002359  | -0.677088 |                         |           |           |           |
| C                      | 3.110858  | -2.505798 | -1.752288 |                         |           |           |           |
| H                      | 3.544147  | -1.611032 | -2.208978 |                         |           |           |           |
| H                      | 2.456811  | -2.972374 | -2.494349 |                         |           |           |           |
| H                      | 3.933621  | -3.206442 | -1.550330 |                         |           |           |           |
| C                      | 0.712716  | -4.223134 | -0.494882 |                         |           |           |           |
| H                      | -0.316446 | -4.390215 | -0.163559 |                         |           |           |           |
| H                      | 1.307415  | -5.092977 | -0.182848 |                         |           |           |           |
| H                      | 0.708844  | -4.203491 | -1.588228 |                         |           |           |           |
| C                      | 0.016159  | -2.989988 | 2.368418  |                         |           |           |           |
| H                      | 0.500035  | -3.767922 | 2.975908  |                         |           |           |           |
| H                      | -0.850784 | -3.446718 | 1.880928  |                         |           |           |           |
| H                      | -0.355720 | -2.224874 | 3.055619  |                         |           |           |           |
| C                      | 1.929216  | -0.489483 | 2.857708  |                         |           |           |           |
| H                      | 0.931241  | -0.320136 | 3.274802  |                         |           |           |           |
| H                      | 2.389620  | 0.486901  | 2.687851  |                         |           |           |           |
| H                      | 2.520013  | -1.008676 | 3.625493  |                         |           |           |           |
| H                      | -4.322507 | 3.447494  | 0.726580  |                         |           |           |           |
| H                      | -6.053489 | 0.869250  | 1.308967  |                         |           |           |           |
| H                      | -2.221417 | 2.908346  | 1.751806  |                         |           |           |           |
| H                      | -4.297324 | 0.865170  | 2.959386  |                         |           |           |           |
| H                      | -2.357541 | 3.303715  | -0.629081 |                         |           |           |           |
| H                      | -4.809343 | -1.145226 | 1.739642  |                         |           |           |           |
| Si                     | -4.293195 | 0.571272  | -1.415119 |                         |           |           |           |
| H                      | -4.844474 | -0.806405 | -1.503569 |                         |           |           |           |
| H                      | -5.416038 | 1.530729  | -1.587883 |                         |           |           |           |
| H                      | -3.355172 | 0.765112  | -2.548860 |                         |           |           |           |
| H                      | -1.650918 | -0.343581 | 2.003102  |                         |           |           |           |
| C                      | 0.351316  | 1.194031  | -0.900241 |                         |           |           |           |
| C                      | 1.484236  | 2.071070  | -0.469226 |                         |           |           |           |
| C                      | 2.494042  | 2.426496  | -1.382597 |                         |           |           |           |
| C                      | 1.548598  | 2.608061  | 0.828661  |                         |           |           |           |
| C                      | 3.532589  | 3.278470  | -1.009845 |                         |           |           |           |

|   |           |          |           |   |           |           |           |
|---|-----------|----------|-----------|---|-----------|-----------|-----------|
| H | 2.471096  | 2.028823 | -2.393006 | C | -0.644926 | 0.653565  | -2.494421 |
| C | 2.590513  | 3.459984 | 1.199825  | H | -1.598175 | 1.190159  | -2.616829 |
| H | 0.763557  | 2.366977 | 1.536746  | H | 0.074802  | 1.110957  | -3.178372 |
| C | 3.588840  | 3.800818 | 0.284707  | H | -0.773018 | -0.377860 | -2.826721 |
| H | 4.299803  | 3.536544 | -1.735505 |   |           |           |           |
| H | 2.611630  | 3.871242 | 2.206190  |   |           |           |           |
| H | 4.395263  | 4.469404 | 0.573213  |   |           |           |           |
| C | -0.284571 | 1.586201 | -2.225195 |   |           |           |           |
| H | 0.411600  | 1.437820 | -3.055298 |   |           |           |           |
| H | -1.173813 | 0.988852 | -2.430796 |   |           |           |           |
| H | -0.577448 | 2.645008 | -2.215627 |   |           |           |           |

**6d**

SCF done: -1042.466326

|    |           |           |           |
|----|-----------|-----------|-----------|
| Ru | 1.293504  | -0.644005 | -0.310799 |
| Si | -2.083925 | -1.272676 | -0.275677 |
| H  | -2.086904 | -1.834428 | -1.645968 |
| Si | -5.009438 | -2.157589 | 0.052055  |
| Si | -3.892288 | 0.050422  | 1.938295  |
| O  | -0.860986 | -0.078888 | -0.109518 |
| O  | 1.280012  | -2.485890 | -2.705947 |
| C  | -3.827733 | -0.642735 | 0.151674  |
| C  | 1.182846  | -1.742890 | -1.809315 |
| C  | 3.019812  | 0.580138  | 0.718775  |
| C  | 3.506854  | -0.463231 | -0.151680 |
| C  | 3.152115  | -1.742689 | 0.450462  |
| C  | 2.348287  | -1.479808 | 1.587096  |
| C  | 2.262845  | -0.035033 | 1.749636  |
| C  | 3.315884  | 2.042030  | 0.566793  |
| H  | 4.286594  | 2.284333  | 1.022730  |
| H  | 2.556998  | 2.666818  | 1.043400  |
| H  | 3.364046  | 2.335618  | -0.485502 |
| C  | 4.480381  | -0.273171 | -1.281574 |
| H  | 4.297376  | 0.666359  | -1.811592 |
| H  | 4.410435  | -1.083170 | -2.013399 |
| H  | 5.515739  | -0.249690 | -0.911145 |
| C  | 3.627835  | -3.087195 | -0.023932 |
| H  | 2.952973  | -3.888864 | 0.289831  |
| H  | 4.622851  | -3.309613 | 0.386268  |
| H  | 3.704951  | -3.130861 | -1.113983 |
| C  | 1.787403  | -2.485341 | 2.552414  |
| H  | 2.417210  | -2.565874 | 3.450345  |
| H  | 1.723102  | -3.481195 | 2.104901  |
| H  | 0.781982  | -2.207849 | 2.886058  |
| C  | 1.597791  | 0.644800  | 2.912291  |
| H  | 0.634736  | 0.181081  | 3.152713  |
| H  | 1.416527  | 1.703266  | 2.712922  |
| H  | 2.223885  | 0.575553  | 3.813346  |
| H  | -5.302717 | 0.144565  | 2.396987  |
| H  | -6.417379 | -1.709765 | 0.191028  |
| H  | -3.157719 | -0.847036 | 2.867616  |
| H  | -4.710621 | -3.126579 | 1.138226  |
| H  | -3.290494 | 1.404054  | 2.012492  |
| H  | -4.857189 | -2.855045 | -1.250863 |
| Si | -4.453984 | 0.694651  | -1.071397 |
| H  | -4.543275 | 0.136670  | -2.446063 |
| H  | -5.808623 | 1.148709  | -0.663589 |
| H  | -3.548512 | 1.868269  | -1.089479 |
| H  | -1.706164 | -2.306329 | 0.715419  |
| C  | -0.119372 | 0.742346  | -1.069333 |
| C  | -0.009744 | 2.149147  | -0.566835 |
| C  | 0.603960  | 3.136052  | -1.364038 |
| C  | -0.503776 | 2.544525  | 0.688727  |
| C  | 0.717487  | 4.453907  | -0.924369 |
| H  | 1.006555  | 2.870991  | -2.337092 |
| C  | -0.389685 | 3.864755  | 1.128099  |
| H  | -0.986666 | 1.808463  | 1.319319  |
| C  | 0.220951  | 4.830245  | 0.325890  |
| H  | 1.196127  | 5.190727  | -1.564816 |
| H  | -0.791527 | 4.139442  | 2.100612  |
| H  | 0.305309  | 5.858741  | 0.666055  |

**2e**

SCF done: -1234.206812

|    |           |           |           |
|----|-----------|-----------|-----------|
| Ru | -1.575108 | -0.384354 | -0.619551 |
| Si | -0.282559 | 1.030119  | 0.711005  |
| H  | -0.091795 | 0.649936  | 2.158819  |
| Si | 0.718450  | 3.543015  | 2.349856  |
| Si | 0.612160  | 3.743599  | -0.746383 |
| O  | 1.653026  | 0.875810  | 0.164368  |
| O  | -2.260782 | 1.715366  | -2.685359 |
| C  | -0.216858 | 2.963380  | 0.791969  |
| C  | -1.971039 | 0.936179  | -1.865581 |
| C  | -1.864043 | -2.695778 | -0.469516 |
| C  | -2.996215 | -2.131096 | -1.143694 |
| C  | -3.685125 | -1.274005 | -0.202787 |
| C  | -2.970836 | -1.303249 | 1.032670  |
| C  | -1.829821 | -2.177945 | 0.865526  |
| C  | -0.940727 | -3.740257 | -1.033399 |
| H  | -1.328835 | -4.750579 | -0.838411 |
| H  | 0.056583  | -3.678853 | -0.588196 |
| H  | -0.826617 | -3.633102 | -2.115776 |
| C  | -3.481648 | -2.497759 | -2.518849 |
| H  | -2.650361 | -2.753567 | -3.182898 |
| H  | -4.030480 | -1.674014 | -2.985489 |
| H  | -4.157457 | -3.365136 | -2.485688 |
| C  | -4.998025 | -0.584262 | -0.453563 |
| H  | -5.122551 | 0.291648  | 0.189714  |
| H  | -5.841512 | -1.261821 | -0.256945 |
| H  | -5.085619 | -0.245834 | -1.490496 |
| C  | -3.412550 | -0.695829 | 2.335323  |
| H  | -4.025640 | -1.405757 | 2.910368  |
| H  | -4.012435 | 0.205737  | 2.181035  |
| H  | -2.559562 | -0.421221 | 2.963568  |
| C  | -0.919302 | -2.633191 | 1.972519  |
| H  | -0.664491 | -1.817300 | 2.656660  |
| H  | 0.018593  | -3.040386 | 1.583759  |
| H  | -1.396043 | -3.423207 | 2.572024  |
| H  | 0.128061  | 5.139444  | -0.934148 |
| H  | 0.957298  | 5.013030  | 2.333614  |
| H  | 2.088148  | 3.815800  | -0.575916 |
| H  | 2.048638  | 2.883693  | 2.461193  |
| H  | 0.326326  | 2.989640  | -1.989224 |
| H  | -0.045747 | 3.224527  | 3.586446  |
| Si | -2.024189 | 3.596650  | 0.914096  |
| H  | -2.793215 | 2.812625  | 1.917320  |
| H  | -2.019397 | 5.013898  | 1.372188  |
| H  | -2.730313 | 3.535149  | -0.385884 |
| C  | 2.553661  | 0.001415  | 0.085632  |
| C  | 2.787905  | -0.954430 | 1.188868  |
| C  | 3.156343  | -2.288147 | 0.929793  |
| C  | 2.611560  | -0.533810 | 2.519570  |
| C  | 3.333214  | -3.182941 | 1.983448  |
| H  | 3.273525  | -2.625199 | -0.094798 |
| C  | 2.815725  | -1.425354 | 3.568533  |
| H  | 2.338291  | 0.495856  | 2.719689  |
| C  | 3.170064  | -2.751425 | 3.302429  |
| H  | 3.599057  | -4.215328 | 1.775669  |
| H  | 2.694820  | -1.088284 | 4.593814  |
| H  | 3.318800  | -3.448059 | 4.122875  |
| C  | 3.361341  | -0.039187 | -1.145552 |
| C  | 4.696476  | -0.488046 | -1.146947 |
| C  | 2.782135  | 0.419842  | -2.345324 |
| C  | 5.436218  | -0.474698 | -2.326293 |
| H  | 5.158307  | -0.816358 | -0.221592 |
| C  | 3.521287  | 0.407685  | -3.523898 |
| H  | 1.749743  | 0.751281  | -2.337587 |
| C  | 4.848344  | -0.033595 | -3.515591 |



|   |           |           |           |
|---|-----------|-----------|-----------|
| H | 6.471026  | -0.804574 | -2.318629 |
| H | 3.064249  | 0.744914  | -4.449503 |
| H | 5.425926  | -0.031343 | -4.436004 |
| H | -0.231128 | -0.613421 | -1.495155 |

|   |           |          |           |
|---|-----------|----------|-----------|
| H | -2.301097 | 5.401103 | 0.915152  |
| H | 0.325260  | 4.364538 | -2.335087 |
| H | -0.622094 | 6.073555 | -0.793064 |
| H | 1.398839  | 0.952942 | -1.673867 |

**TS<sub>23a</sub>**

SCF done: -1234.163155

|    |           |           |           |
|----|-----------|-----------|-----------|
| Ru | 1.907235  | -0.077300 | -0.553078 |
| Si | -0.347371 | -0.703039 | -0.349441 |
| H  | -1.090344 | 0.302804  | 0.729201  |
| Si | -2.290421 | -2.684338 | 1.382676  |
| Si | -1.964558 | -3.020299 | -1.731543 |
| O  | -1.632530 | 0.133144  | -1.407427 |
| O  | 2.340254  | -1.908761 | -2.928370 |
| C  | -1.096463 | -2.472354 | -0.104229 |
| C  | 2.131763  | -1.227281 | -2.006248 |
| C  | 3.399986  | 1.525498  | 0.173997  |
| C  | 4.106897  | 0.289098  | 0.008129  |
| C  | 3.606611  | -0.651853 | 0.991758  |
| C  | 2.570423  | -0.005872 | 1.720868  |
| C  | 2.424532  | 1.343431  | 1.208697  |
| C  | 3.700434  | 2.815772  | -0.536796 |
| C  | 4.438172  | 3.406818  | 0.024817  |
| H  | 2.802138  | 3.428871  | -0.651283 |
| H  | 4.109675  | 2.638395  | -1.535319 |
| C  | 5.295885  | 0.063361  | -0.883854 |
| H  | 5.246484  | 0.680669  | -1.785539 |
| H  | 5.368659  | -0.980509 | -1.203613 |
| H  | 6.230807  | 0.312685  | -0.361773 |
| C  | 4.188432  | -2.009903 | 1.269290  |
| H  | 3.459349  | -2.674079 | 1.741982  |
| H  | 5.053527  | -1.936464 | 1.944526  |
| H  | 4.532977  | -2.498485 | 0.352454  |
| C  | 1.871288  | -0.544921 | 2.937881  |
| H  | 2.408966  | -0.253100 | 3.851765  |
| H  | 1.815180  | -1.636756 | 2.925098  |
| H  | 0.851129  | -0.159126 | 3.027009  |
| C  | 1.564098  | 2.419728  | 1.809834  |
| H  | 0.636840  | 2.011523  | 2.223080  |
| H  | 1.286822  | 3.174498  | 1.068751  |
| H  | 2.088324  | 2.934772  | 2.628975  |
| H  | -2.076481 | -4.504613 | -1.742932 |
| H  | -2.287897 | -4.104328 | 1.828114  |
| H  | -3.333395 | -2.467546 | -1.855100 |
| H  | -3.689387 | -2.331592 | 1.050251  |
| H  | -1.169087 | -2.616334 | -2.917280 |
| H  | -1.848001 | -1.861901 | 2.539598  |
| Si | 0.363890  | -3.698918 | 0.200542  |
| H  | 1.088132  | -3.374120 | 1.454676  |
| H  | -0.208250 | -5.062125 | 0.362984  |
| H  | 1.320951  | -3.733833 | -0.925927 |
| C  | -2.110869 | 0.917484  | -0.432615 |
| C  | -3.433635 | 0.546487  | 0.165993  |
| C  | -3.737625 | 0.710512  | 1.525678  |
| C  | -4.427398 | 0.080560  | -0.707571 |
| C  | -5.015155 | 0.420911  | 2.001446  |
| H  | -2.960815 | 1.027682  | 2.215634  |
| C  | -5.706841 | -0.201893 | -0.229040 |
| H  | -4.188497 | -0.052964 | -1.756924 |
| C  | -6.004437 | -0.031767 | 1.124123  |
| H  | -5.234878 | 0.536612  | 3.059109  |
| H  | -6.469228 | -0.560790 | -0.914717 |
| H  | -6.999365 | -0.259129 | 1.496710  |
| C  | -1.719072 | 2.346947  | -0.492263 |
| C  | -2.269373 | 3.328306  | 0.357801  |
| C  | -0.782742 | 2.740836  | -1.467295 |
| C  | -1.869128 | 4.655542  | 0.253537  |
| H  | -3.019928 | 3.057536  | 1.090466  |
| C  | -0.392220 | 4.075280  | -1.572397 |
| H  | -0.382789 | 1.992886  | -2.137417 |
| C  | -0.925739 | 5.033399  | -0.709218 |

**3e**

SCF done: -1234.236552

|    |           |           |           |
|----|-----------|-----------|-----------|
| Ru | 1.889427  | -0.175833 | 0.428820  |
| Si | 0.108363  | 1.054349  | -0.322678 |
| H  | -1.250211 | -1.235579 | 0.543355  |
| Si | -1.773313 | 3.201230  | -1.712867 |
| Si | -0.119189 | 3.956435  | 0.803004  |
| O  | -1.507084 | 0.565200  | -0.435570 |
| O  | 3.528322  | 2.233956  | 1.248535  |
| C  | -0.109055 | 2.887171  | -0.803214 |
| C  | 2.841921  | 1.354799  | 0.918396  |
| C  | 2.154911  | -2.452331 | 0.917192  |
| C  | 3.434273  | -1.801054 | 0.927178  |
| C  | 3.701404  | -1.338306 | -0.420330 |
| C  | 2.581815  | -1.674395 | -1.236162 |
| C  | 1.612393  | -2.359020 | -0.402869 |
| C  | 1.546713  | -3.194329 | 2.074326  |
| H  | 1.887228  | -4.239356 | 2.085053  |
| H  | 0.454543  | -3.206038 | 2.020232  |
| H  | 1.826605  | -2.744784 | 3.030834  |
| C  | 4.410369  | -1.784445 | 2.070662  |
| H  | 3.897817  | -1.749707 | 3.036332  |
| H  | 5.075586  | -0.917338 | 2.021336  |
| H  | 5.042285  | -2.684198 | 2.062493  |
| C  | 4.993033  | -0.730859 | -0.893030 |
| H  | 4.844705  | -0.107476 | -1.779338 |
| H  | 5.715890  | -1.515617 | -1.156898 |
| H  | 5.455208  | -0.106376 | -0.122976 |
| C  | 2.494101  | -1.525681 | -2.729725 |
| H  | 2.942667  | -2.394943 | -3.232821 |
| H  | 3.021677  | -0.634870 | -3.081919 |
| H  | 1.456839  | -1.454040 | -3.068564 |
| C  | 0.399805  | -3.084727 | -0.916818 |
| H  | -0.148676 | -2.507422 | -1.666235 |
| H  | -0.302194 | -3.328032 | -0.114889 |
| H  | 0.693002  | -4.034846 | -1.386594 |
| H  | -0.553323 | 5.336776  | 0.462098  |
| H  | -1.730132 | 4.575825  | -2.283616 |
| H  | -1.072329 | 3.398411  | 1.794486  |
| H  | -2.944098 | 3.127955  | -0.808489 |
| H  | 1.227633  | 4.025271  | 1.416514  |
| H  | -1.959082 | 2.261417  | -2.846976 |
| Si | 1.322096  | 3.476159  | -1.938905 |
| H  | 1.254958  | 2.775250  | -3.249291 |
| H  | 1.181789  | 4.933978  | -2.194831 |
| H  | 2.654288  | 3.235124  | -1.341123 |
| C  | -2.070801 | -0.609296 | 0.170310  |
| C  | -2.863196 | -1.410872 | -0.857055 |
| C  | -3.467511 | -2.612913 | -0.458329 |
| C  | -2.997056 | -0.997322 | -2.185664 |
| C  | -4.185345 | -3.385557 | -1.368969 |
| H  | -3.383253 | -2.937864 | 0.576185  |
| C  | -3.721002 | -1.770971 | -3.098980 |
| H  | -2.539288 | -0.067412 | -2.502485 |
| C  | -4.315307 | -2.966016 | -2.696364 |
| H  | -4.646557 | -4.314002 | -1.042386 |
| H  | -3.819229 | -1.432669 | -4.127361 |
| H  | -4.877087 | -3.566172 | -3.407105 |
| H  | -2.913206 | -0.184731 | 1.366842  |
| C  | -2.488584 | -0.480677 | 2.666446  |
| C  | -4.107318 | 0.527309  | 1.186474  |
| C  | -3.244624 | -0.077999 | 3.771032  |
| H  | -1.556841 | -1.021302 | 2.816482  |
| C  | -4.858466 | 0.935933  | 2.286639  |
| H  | -4.446485 | 0.755856  | 0.180075  |
| C  | -4.430300 | 0.631704  | 3.582838  |

|   |           |           |          |   |           |          |          |
|---|-----------|-----------|----------|---|-----------|----------|----------|
| H | -2.903448 | -0.316757 | 4.774898 | C | -0.872152 | 4.565635 | 2.173356 |
| H | -5.781605 | 1.489020  | 2.134536 | H | 0.586076  | 5.334674 | 0.783525 |
| H | -5.019475 | 0.947646  | 4.439677 | H | -2.328573 | 3.522060 | 3.376984 |
| H | 1.070704  | -0.009238 | 1.822811 | H | -0.824775 | 5.428934 | 2.831434 |

**7g**

SCF done: -1234.196655

|    |           |           |           |
|----|-----------|-----------|-----------|
| Ru | -0.071108 | -0.769087 | 0.452531  |
| Si | 2.255505  | -0.984937 | -0.396686 |
| H  | 3.040535  | -1.844867 | 0.550615  |
| Si | 5.126601  | -0.412703 | -1.326629 |
| Si | 2.889536  | 1.424533  | -2.410505 |
| O  | 0.038753  | 0.782607  | -1.079206 |
| O  | 1.040453  | 0.706450  | 2.829429  |
| C  | 3.471848  | 0.448480  | -0.867099 |
| C  | 0.638022  | 0.220682  | 1.853162  |
| C  | -2.140232 | -2.045114 | 0.579611  |
| C  | -1.413179 | -2.065737 | 1.803456  |
| C  | -0.136633 | -2.704841 | 1.552245  |
| C  | -0.133661 | -3.141440 | 0.171739  |
| C  | -1.331927 | -2.683457 | -0.436191 |
| C  | -3.571335 | -1.630937 | 0.414549  |
| H  | -4.232730 | -2.487733 | 0.608577  |
| H  | -3.784453 | -1.274227 | -0.594651 |
| H  | -3.852455 | -0.837883 | 1.113008  |
| C  | -1.930048 | -1.649996 | 3.153144  |
| H  | -2.682480 | -0.859852 | 3.073345  |
| H  | -1.129610 | -1.280041 | 3.799816  |
| H  | -2.400116 | -2.501284 | 3.665004  |
| C  | 0.842691  | -3.141700 | 2.606993  |
| H  | 1.862635  | -3.190981 | 2.215893  |
| H  | 0.581365  | -4.138871 | 2.987774  |
| H  | 0.850368  | -2.454612 | 3.457907  |
| C  | 0.858542  | -4.078772 | -0.450012 |
| H  | 0.525402  | -5.115695 | -0.300020 |
| H  | 1.851641  | -3.988267 | -0.002785 |
| H  | 0.959007  | -3.916742 | -1.526453 |
| C  | -1.770292 | -3.016448 | -1.834340 |
| H  | -0.932319 | -2.986446 | -2.537950 |
| H  | -2.534506 | -2.326060 | -2.196069 |
| H  | -2.194108 | -4.030306 | -1.873075 |
| H  | 4.081928  | 1.919045  | -3.158241 |
| H  | 6.157046  | 0.596796  | -1.689911 |
| H  | 2.112594  | 0.568380  | -3.341265 |
| H  | 4.948831  | -1.322428 | -2.489987 |
| H  | 2.088938  | 2.624498  | -2.066902 |
| H  | 5.650510  | -1.214967 | -0.190153 |
| Si | 3.822595  | 1.656225  | 0.569495  |
| H  | 4.301337  | 0.921105  | 1.770704  |
| H  | 4.892334  | 2.615325  | 0.175480  |
| H  | 2.623479  | 2.444578  | 0.935735  |
| H  | 2.155642  | -1.781085 | -1.661227 |
| C  | -1.048183 | 1.182278  | -0.510569 |
| C  | -2.321415 | 1.004597  | -1.293454 |
| C  | -3.555926 | 1.556316  | -0.908159 |
| C  | -2.241713 | 0.362171  | -2.543643 |
| C  | -4.679004 | 1.436901  | -1.728134 |
| H  | -3.641527 | 2.101207  | 0.024171  |
| C  | -3.362301 | 0.249238  | -3.363204 |
| H  | -1.279772 | -0.021153 | -2.865166 |
| C  | -4.590572 | 0.779878  | -2.956104 |
| H  | -5.622637 | 1.871214  | -1.408647 |
| H  | -3.274503 | -0.241139 | -4.329393 |
| H  | -5.463694 | 0.696265  | -3.597587 |
| C  | -0.989841 | 2.325898  | 0.474501  |
| C  | -0.138186 | 3.400721  | 0.182138  |
| C  | -1.779386 | 2.388444  | 1.633965  |
| C  | -0.808898 | 4.511589  | 1.025647  |
| H  | 0.476580  | 3.358601  | -0.710351 |
| C  | -1.720163 | 3.496911  | 2.476720  |
| H  | -2.416540 | 1.547907  | 1.895358  |

**TS<sub>78g</sub>**

SCF done: -1234.168500

|    |           |           |          |
|----|-----------|-----------|----------|
| Ru | -0.651336 | -0.845188 | 0.57413  |
| Si | 1.725215  | -1.140058 | -0.50777 |
| H  | 2.219387  | -2.111719 | 0.52363  |
| Si | 4.505166  | -1.707964 | -1.67179 |
| Si | 3.155321  | 0.945445  | -2.46223 |
| O  | 0.616270  | 0.440238  | -0.66706 |
| O  | 0.828473  | -0.617097 | 3.19415  |
| C  | 3.371545  | -0.294869 | -1.02378 |
| C  | 0.299877  | -0.614830 | 2.15729  |
| C  | -2.920542 | -1.356137 | -0.00093 |
| C  | -2.594282 | -1.679460 | 1.35864  |
| C  | -1.606335 | -2.747649 | 1.33290  |
| C  | -1.298132 | -3.029403 | -0.03099 |
| C  | -2.092379 | -2.146595 | -0.85252 |
| C  | -4.006925 | -0.417508 | -0.43212 |
| H  | -4.970396 | -0.945360 | -0.47345 |
| H  | -3.816457 | 0.005293  | -1.42084 |
| H  | -4.119755 | 0.418380  | 0.26339  |
| C  | -3.333048 | -1.196349 | 2.57582  |
| H  | -3.641611 | -0.151695 | 2.46998  |
| H  | -2.719940 | -1.271337 | 3.47851  |
| H  | -4.240931 | -1.793062 | 2.74472  |
| C  | -1.133489 | -3.533861 | 2.52430  |
| H  | -0.128413 | -3.937454 | 2.37014  |
| H  | -1.806705 | -4.381362 | 2.71351  |
| H  | -1.108355 | -2.924751 | 3.43187  |
| C  | -0.425362 | -4.144763 | -0.52799 |
| H  | -1.011702 | -5.063849 | -0.66800 |
| H  | 0.379706  | -4.373938 | 0.17704  |
| H  | 0.035428  | -3.903532 | -1.49043 |
| C  | -2.132498 | -2.179932 | -2.35409 |
| H  | -1.134753 | -2.322811 | -2.78223 |
| H  | -2.544151 | -1.256120 | -2.76677 |
| H  | -2.759306 | -3.011514 | -2.70577 |
| H  | 4.457851  | 1.130569  | -3.16065 |
| H  | 5.898054  | -1.212276 | -1.81764 |
| H  | 2.180924  | 0.431653  | -3.45983 |
| H  | 4.042709  | -2.188040 | -3.00144 |
| H  | 2.712973  | 2.287729  | -2.01487 |
| H  | 4.518899  | -2.867160 | -0.74240 |
| Si | 4.264151  | 0.516892  | 0.46367  |
| H  | 4.766808  | -0.532229 | 1.39070  |
| H  | 5.434338  | 1.305648  | -0.00779 |
| H  | 3.364331  | 1.419905  | 1.21679  |
| H  | 1.261297  | -1.889618 | -1.70235 |
| C  | -0.346145 | 1.197644  | -0.00196 |
| C  | -1.375351 | 1.731822  | -0.96136 |
| C  | -2.352047 | 2.650412  | -0.53474 |
| C  | -1.362222 | 1.365837  | -2.31913 |
| C  | -3.287433 | 3.170139  | -1.42871 |
| H  | -2.369427 | 2.972251  | 0.50158  |
| C  | -2.297288 | 1.890479  | -3.21251 |
| H  | -0.598818 | 0.681440  | -2.67080 |
| C  | -3.267868 | 2.794158  | -2.77369 |
| H  | -4.028987 | 3.880673  | -1.07221 |
| H  | -2.255404 | 1.602186  | -4.26016 |
| H  | -3.990569 | 3.208255  | -3.47152 |
| C  | 0.159892  | 2.232560  | 0.98056  |
| C  | 1.142035  | 3.151010  | 0.57876  |
| C  | -0.405701 | 2.380742  | 2.25453  |
| C  | 1.570033  | 4.163618  | 1.43775  |
| H  | 1.567386  | 3.074256  | -0.41616 |
| C  | 0.009194  | 3.402787  | 3.11030  |
| H  | -1.170894 | 1.680985  | 2.57684  |

|   |           |          |         |
|---|-----------|----------|---------|
| C | 1.004753  | 4.294070 | 2.70772 |
| H | 2.341300  | 4.855899 | 1.11000 |
| H | -0.440212 | 3.494060 | 4.09571 |
| H | 1.335730  | 5.084230 | 3.37639 |

|   |           |          |          |
|---|-----------|----------|----------|
| C | 1.752653  | 3.984010 | 2.792754 |
| H | -0.043642 | 3.732716 | 3.957586 |
| H | 3.399786  | 4.039728 | 1.397047 |
| H | 2.191007  | 4.712962 | 3.469311 |

**8g**

SCF done: -1234.192989

|    |           |           |           |
|----|-----------|-----------|-----------|
| Ru | -1.343414 | -0.471518 | 0.509658  |
| Si | 2.025684  | -0.890210 | 0.872184  |
| H  | 2.448873  | 0.018172  | 1.958846  |
| Si | 4.643570  | -2.490663 | 0.895363  |
| Si | 2.939388  | -2.438295 | -1.705233 |
| O  | 0.791929  | -0.163258 | -0.088119 |
| O  | -1.012232 | -0.551020 | 3.508053  |
| C  | 3.512765  | -1.391054 | -0.204958 |
| C  | -1.049095 | -0.448188 | 2.344635  |
| C  | -3.166296 | -0.266123 | -0.989391 |
| C  | -3.570371 | -0.409141 | 0.389141  |
| C  | -3.198408 | -1.750167 | 0.816646  |
| C  | -2.465502 | -2.360031 | -0.235604 |
| C  | -2.448489 | -1.432921 | -1.356536 |
| C  | -3.511407 | 0.893463  | -1.874358 |
| H  | -4.512520 | 0.755654  | -2.307878 |
| H  | -2.803503 | 1.008447  | -2.698406 |
| H  | -3.520697 | 1.835474  | -1.319386 |
| C  | -4.497438 | 0.517321  | 1.125851  |
| H  | -4.314210 | 1.562630  | 0.859367  |
| H  | -4.379778 | 0.427504  | 2.209735  |
| H  | -5.548369 | 0.295220  | 0.888520  |
| C  | -3.608065 | -2.395310 | 2.110887  |
| H  | -2.897780 | -3.165963 | 2.423953  |
| H  | -4.592414 | -2.871937 | 2.004128  |
| H  | -3.681727 | -1.667498 | 2.923413  |
| C  | -1.935726 | -3.765709 | -0.265425 |
| H  | -2.648893 | -4.448964 | -0.749389 |
| H  | -1.748292 | -4.145197 | 0.743140  |
| H  | -0.994965 | -3.831885 | -0.821629 |
| C  | -1.879322 | -1.749793 | -2.710287 |
| H  | -0.948672 | -2.322064 | -2.632894 |
| H  | -1.667181 | -0.844964 | -3.284477 |
| H  | -2.584985 | -2.359463 | -3.292613 |
| H  | 4.087846  | -3.203014 | -2.258639 |
| H  | 5.962342  | -2.675959 | 0.239906  |
| H  | 1.888878  | -3.406180 | -1.296307 |
| H  | 4.028608  | -3.825522 | 1.110728  |
| H  | 2.397281  | -1.581196 | -2.789128 |
| H  | 4.859231  | -1.856500 | 2.221916  |
| Si | 4.535039  | 0.099938  | -0.835781 |
| H  | 5.141340  | 0.839165  | 0.301678  |
| H  | 5.631768  | -0.382375 | -1.715275 |
| H  | 3.689871  | 1.033613  | -1.618986 |
| H  | 1.448730  | -2.136871 | 1.425638  |
| C  | 0.027610  | 1.091746  | 0.057066  |
| C  | -0.156726 | 1.718521  | -1.296151 |
| C  | -0.784921 | 2.976493  | -1.387497 |
| C  | 0.277276  | 1.115924  | -2.489065 |
| C  | -0.979410 | 3.598283  | -2.618688 |
| H  | -1.113253 | 3.472910  | -0.478910 |
| C  | 0.083587  | 1.742760  | -3.722828 |
| H  | 0.780434  | 0.157765  | -2.446738 |
| C  | -0.547279 | 2.985377  | -3.798231 |
| H  | -1.465376 | 4.570187  | -2.655821 |
| H  | 0.441045  | 1.257689  | -4.628251 |
| H  | -0.692369 | 3.473266  | -4.758293 |
| C  | 0.618784  | 2.077391  | 1.047086  |
| C  | -0.056837 | 2.486021  | 2.202685  |
| C  | 1.861353  | 2.675581  | 0.763689  |
| C  | 0.502212  | 3.432204  | 3.067085  |
| H  | -1.031298 | 2.063798  | 2.417848  |
| C  | 2.432541  | 3.603010  | 1.632268  |
| H  | 2.373084  | 2.420904  | -0.160307 |

**2h**

SCF done: -850.724881

|    |           |           |           |
|----|-----------|-----------|-----------|
| Ru | 0.937489  | -0.178349 | -0.455882 |
| Si | -1.207865 | 0.281837  | 0.329157  |
| H  | -1.328311 | 0.962306  | 1.676630  |
| Si | -4.142316 | -0.058399 | 1.438961  |
| Si | -3.602250 | -0.688216 | -1.561585 |
| O  | -2.061870 | 1.896219  | -0.632108 |
| O  | -0.017435 | -1.942972 | -2.721155 |
| C  | -2.848193 | -0.725978 | 0.202663  |
| C  | 0.307668  | -1.250834 | -1.840982 |
| C  | 3.020990  | 0.691189  | 0.139746  |
| C  | 3.204750  | -0.623057 | -0.401319 |
| C  | 2.553031  | -1.560807 | 0.488307  |
| C  | 1.962923  | -0.822716 | 1.557262  |
| C  | 2.237300  | 0.581502  | 1.334581  |
| C  | 3.648474  | 1.948736  | -0.395329 |
| H  | 4.652605  | 2.093402  | 0.028300  |
| H  | 3.059060  | 2.836241  | -0.145035 |
| H  | 3.750781  | 1.915979  | -1.483566 |
| C  | 4.067658  | -0.982426 | -1.579338 |
| H  | 4.064835  | -0.191490 | -2.335301 |
| H  | 3.723095  | -1.899991 | -2.065439 |
| H  | 5.111383  | -1.145175 | -1.273204 |
| C  | 2.613590  | -3.059048 | 0.374834  |
| H  | 1.745794  | -3.533349 | 0.842164  |
| H  | 3.513373  | -3.454078 | 0.868038  |
| H  | 2.643618  | -3.384774 | -0.669115 |
| C  | 1.342048  | -1.396854 | 2.800478  |
| H  | 2.101268  | -1.537367 | 3.584209  |
| H  | 0.881067  | -2.370510 | 2.612716  |
| H  | 0.570155  | -0.739449 | 3.212530  |
| C  | 1.944711  | 1.680194  | 2.318028  |
| H  | 0.951067  | 1.571578  | 2.766774  |
| H  | 1.993151  | 2.667965  | 1.848531  |
| H  | 2.673056  | 1.679450  | 3.142027  |
| H  | -4.378836 | -1.933471 | -1.808216 |
| H  | -5.471027 | -0.698146 | 1.231990  |
| H  | -4.546018 | 0.452060  | -1.707923 |
| H  | -4.319329 | 1.410173  | 1.284200  |
| H  | -2.565548 | -0.569261 | -2.611950 |
| H  | -3.725142 | -0.325075 | 2.841955  |
| Si | -2.448315 | -2.546693 | 0.657521  |
| H  | -1.665046 | -2.620602 | 1.920248  |
| H  | -3.718514 | -3.289845 | 0.880234  |
| H  | -1.686817 | -3.234275 | -0.411569 |
| C  | -1.664530 | 3.058897  | -0.750667 |
| H  | 0.715988  | 1.051895  | -1.490843 |
| C  | -0.498394 | 3.640919  | -0.030823 |
| H  | 0.370765  | 3.055611  | -0.383440 |
| H  | -0.587680 | 3.384264  | 1.033723  |
| H  | -2.209215 | 3.690315  | -1.471348 |
| C  | -0.315251 | 5.144242  | -0.252328 |
| H  | -1.166888 | 5.715945  | 0.132632  |
| H  | 0.581867  | 5.497849  | 0.263628  |
| H  | -0.199839 | 5.380046  | -1.316090 |

**TS<sub>23h</sub>**  
SCF done: -850.708385

|    |           |           |           |
|----|-----------|-----------|-----------|
| Ru | 0.952271  | -0.063414 | -0.422133 |
| Si | -1.222802 | 0.508087  | 0.444945  |
| H  | -1.188061 | 0.755740  | 1.932698  |
| Si | -4.114562 | 0.057474  | 1.571527  |
| Si | -3.710690 | 0.224942  | -1.505821 |
| O  | -1.772707 | 2.173590  | -0.135901 |
| O  | -0.186997 | -0.993578 | -3.075036 |

|    |           |           |           |                         |           |           |           |
|----|-----------|-----------|-----------|-------------------------|-----------|-----------|-----------|
| C  | -2.916848 | -0.365008 | 0.139831  | H                       | 4.928832  | -1.816060 | -0.994658 |
| C  | 0.202299  | -0.610519 | -2.048038 | C                       | 2.072351  | -3.085475 | 0.615696  |
| C  | 3.178618  | -0.060298 | 0.226480  | H                       | 1.112420  | -3.365716 | 1.055489  |
| C  | 2.909075  | -1.299768 | -0.424881 | H                       | 2.862938  | -3.576612 | 1.199862  |
| C  | 1.914686  | -2.006441 | 0.358566  | H                       | 2.108212  | -3.499722 | -0.395784 |
| C  | 1.608830  | -1.204981 | 1.508529  | C                       | 1.038673  | -1.011804 | 2.851233  |
| C  | 2.360081  | 0.017333  | 1.414565  | H                       | 1.730977  | -1.052260 | 3.703882  |
| C  | 4.221866  | 0.942115  | -0.182701 | H                       | 0.543253  | -1.982558 | 2.781204  |
| H  | 5.187197  | 0.707650  | 0.287537  | H                       | 0.277210  | -0.262114 | 3.087400  |
| H  | 3.949705  | 1.957471  | 0.120132  | C                       | 2.171624  | 1.851630  | 2.146521  |
| H  | 4.374140  | 0.948811  | -1.265505 | H                       | 1.182082  | 1.893888  | 2.611204  |
| C  | 3.618901  | -1.845012 | -1.632684 | H                       | 2.311011  | 2.770111  | 1.570131  |
| H  | 3.985871  | -1.043972 | -2.280844 | H                       | 2.914622  | 1.851727  | 2.956370  |
| H  | 2.963499  | -2.481399 | -2.234576 | H                       | -4.399321 | -1.978009 | -1.672152 |
| H  | 4.484801  | -2.453554 | -1.335774 | H                       | -5.168296 | -1.187119 | 1.492129  |
| C  | 1.465434  | -3.419805 | 0.113855  | H                       | -4.715404 | 0.373010  | -1.355359 |
| H  | 0.477241  | -3.610017 | 0.540307  | H                       | -4.204619 | 1.009880  | 1.707831  |
| H  | 2.166450  | -4.136009 | 0.566078  | H                       | -2.812839 | -0.440291 | -2.602501 |
| H  | 1.411444  | -3.645547 | -0.955190 | H                       | -3.296425 | -0.840851 | 2.956000  |
| C  | 0.795044  | -1.628082 | 2.698162  | Si                      | -2.119913 | -2.648653 | 0.422130  |
| H  | 1.456118  | -2.009106 | 3.489553  | H                       | -1.232869 | -2.803344 | 1.606093  |
| H  | 0.088299  | -2.423879 | 2.448717  | H                       | -3.295995 | -3.530260 | 0.647247  |
| H  | 0.225415  | -0.796153 | 3.123723  | H                       | -1.389346 | -3.162426 | -0.762598 |
| C  | 2.436806  | 1.077278  | 2.477793  | C                       | -1.823712 | 3.039555  | -0.690136 |
| H  | 1.474316  | 1.211530  | 2.982504  | H                       | 1.430084  | 0.889323  | -1.844179 |
| H  | 2.734857  | 2.046497  | 2.064879  | C                       | -0.957931 | 3.751973  | 0.043417  |
| H  | 3.174920  | 0.815571  | 3.249859  | H                       | -0.430005 | 3.279213  | 0.869476  |
| H  | -4.659469 | -0.813277 | -1.995720 | H                       | 0.383446  | 1.500565  | -0.724482 |
| H  | -5.498017 | -0.396793 | 1.258122  | C                       | -0.693503 | 5.212708  | -0.194568 |
| H  | -4.488942 | 1.475972  | -1.318938 | H                       | -0.939932 | 5.817999  | 0.689129  |
| H  | -4.158133 | 1.520363  | 1.821695  | H                       | 0.363779  | 5.404727  | -0.424512 |
| H  | -2.699135 | 0.450963  | -2.564990 | H                       | -1.287405 | 5.593335  | -1.033484 |
| H  | -3.693427 | -0.618576 | 2.828541  | H                       | -2.382064 | 3.502422  | -1.503819 |
| Si | -2.699294 | -2.260121 | 0.060460  |                         |           |           |           |
| H  | -1.908558 | -2.761623 | 1.216779  |                         |           |           |           |
| H  | -4.028084 | -2.926755 | 0.117870  | <b>TS<sub>24h</sub></b> |           |           |           |
| H  | -2.021052 | -2.693327 | -1.185528 | SCF done: -850.691180   |           |           |           |
| C  | -1.017769 | 3.194213  | -0.378825 | Ru                      | 1.154512  | 0.234356  | -0.496189 |
| H  | 1.212644  | 1.421762  | -1.159629 | Si                      | -1.112214 | 0.118247  | -0.031167 |
| C  | 0.277422  | 3.359680  | 0.111279  | H                       | -1.605340 | 1.131201  | 1.147415  |
| H  | 0.480625  | 2.932648  | 1.094216  | Si                      | -3.222645 | -1.291252 | 1.899849  |
| H  | 0.742115  | 2.192682  | -0.540424 | Si                      | -3.755325 | -1.278183 | -1.187528 |
| C  | 1.088730  | 4.585598  | -0.255992 | O                       | -2.268401 | 1.309134  | -1.041792 |
| H  | 1.032291  | 5.357405  | 0.521221  | O                       | 0.786681  | -1.078217 | -3.206403 |
| H  | 2.146898  | 4.331120  | -0.388371 | C                       | -2.399309 | -1.313602 | 0.174283  |
| H  | 0.739585  | 5.027192  | -1.196223 | C                       | 0.886209  | -0.578617 | -2.158841 |
| H  | -1.397937 | 3.857871  | -1.162960 | C                       | 3.052767  | 1.314721  | 0.250991  |

### 3h

SCF done: -850.730777

|    |           |           |           |
|----|-----------|-----------|-----------|
| Ru | 1.040869  | 0.025205  | -0.549465 |
| Si | -1.279328 | 0.467969  | 0.248238  |
| H  | -1.142510 | 0.894199  | 1.683360  |
| Si | -3.891542 | -0.438494 | 1.652177  |
| Si | -3.686010 | -0.691539 | -1.433114 |
| O  | -2.152212 | 1.729788  | -0.555409 |
| O  | -0.156570 | -1.570825 | -2.841446 |
| C  | -2.691503 | -0.844971 | 0.208783  |
| C  | 0.242569  | -0.963733 | -1.940572 |
| C  | 3.172128  | 0.500724  | 0.136841  |
| C  | 3.121760  | -0.870775 | -0.302009 |
| C  | 2.271622  | -1.595840 | 0.612359  |
| C  | 1.792369  | -0.674673 | 1.597959  |
| C  | 2.326386  | 0.628116  | 1.288007  |
| C  | 4.057693  | 1.577295  | -0.426179 |
| H  | 5.022130  | 1.590673  | 0.100104  |
| H  | 3.607555  | 2.567769  | -0.318565 |
| H  | 4.261063  | 1.418849  | -1.488393 |
| C  | 3.961158  | -1.478715 | -1.391206 |
| H  | 4.163098  | -0.761034 | -2.191127 |
| H  | 3.471336  | -2.346057 | -1.842906 |

### TS<sub>24h</sub>

SCF done: -850.691180

|    |           |           |           |
|----|-----------|-----------|-----------|
| Ru | 1.154512  | 0.234356  | -0.496189 |
| Si | -1.112214 | 0.118247  | -0.031167 |
| H  | -1.605340 | 1.131201  | 1.147415  |
| Si | -3.222645 | -1.291252 | 1.899849  |
| Si | -3.755325 | -1.278183 | -1.187528 |
| O  | -2.268401 | 1.309134  | -1.041792 |
| O  | 0.786681  | -1.078217 | -3.206403 |
| C  | -2.399309 | -1.313602 | 0.174283  |
| C  | 0.886209  | -0.578617 | -2.158841 |
| C  | 3.052767  | 1.314721  | 0.250991  |
| C  | 3.446279  | 0.055475  | -0.306508 |
| C  | 2.888952  | -0.996882 | 0.519709  |
| C  | 2.138504  | -0.380499 | 1.561163  |
| C  | 2.213997  | 1.055310  | 1.387453  |
| C  | 3.526521  | 2.666510  | -0.205542 |
| H  | 4.461637  | 2.942022  | 0.302921  |
| H  | 2.790315  | 3.445579  | 0.011110  |
| H  | 3.716803  | 2.684254  | -1.282075 |
| C  | 4.415411  | -0.147347 | -1.438080 |
| H  | 4.393761  | 0.689732  | -2.141739 |
| H  | 4.193124  | -1.057666 | -2.003082 |
| H  | 5.444380  | -0.237470 | -1.061473 |
| C  | 3.176099  | -2.465027 | 0.371244  |
| H  | 2.374244  | -3.077884 | 0.793304  |
| H  | 4.108122  | -2.740310 | 0.886219  |
| H  | 3.288675  | -2.749183 | -0.679567 |
| C  | 1.522815  | -1.076937 | 2.742578  |
| H  | 2.241859  | -1.134485 | 3.572691  |
| H  | 1.220555  | -2.099119 | 2.500065  |
| H  | 0.640915  | -0.547216 | 3.115343  |
| C  | 1.703785  | 2.082111  | 2.360754  |
| H  | 0.766432  | 1.766773  | 2.830297  |
| H  | 1.519336  | 3.042363  | 1.869618  |
| H  | 2.428714  | 2.261282  | 3.168576  |
| H  | -4.411404 | -2.614426 | -1.221611 |

|    |           |           |           |                       |           |           |           |
|----|-----------|-----------|-----------|-----------------------|-----------|-----------|-----------|
| H  | -4.116105 | -2.466786 | 2.078276  | C                     | -3.721548 | 3.484480  | 1.226209  |
| H  | -4.815351 | -0.280707 | -0.894314 | H                     | -3.838112 | 4.056904  | 2.153337  |
| H  | -4.040325 | -0.064583 | 2.086055  | H                     | -4.414600 | 3.903068  | 0.485666  |
| H  | -3.183173 | -1.015394 | -2.527816 | H                     | -4.029757 | 2.453272  | 1.424422  |
| H  | -2.196961 | -1.326509 | 2.975683  | H                     | -2.707562 | 3.150034  | -1.365890 |
| Si | -1.441630 | -2.977844 | -0.015019 |                       |           |           |           |
| H  | -0.349385 | -3.097196 | 0.980859  | <b>5i</b>             |           |           |           |
| H  | -2.397913 | -4.090600 | 0.230154  | SCF done: -850.736869 |           |           |           |
| H  | -0.882906 | -3.130694 | -1.378249 | Ru                    | -0.835196 | 0.071519  | 0.126597  |
| C  | -2.323337 | 2.174298  | -0.083316 | Si                    | 1.289007  | -1.163684 | -0.216893 |
| H  | 0.697734  | 1.603415  | -1.225961 | H                     | 1.295633  | -2.381976 | 0.661397  |
| C  | -3.635086 | 2.650356  | 0.458114  | Si                    | 4.263638  | -1.911486 | -0.459852 |
| H  | -4.331937 | 1.811434  | 0.525625  | Si                    | 3.429839  | 0.925657  | -1.368645 |
| H  | -3.484979 | 3.068645  | 1.459140  | O                     | 0.133130  | 1.393311  | -1.276390 |
| C  | -4.198727 | 3.735788  | -0.489893 | O                     | 0.101755  | 0.738889  | 2.917805  |
| H  | -5.148080 | 4.109085  | -0.093450 | C                     | 3.084389  | -0.445106 | -0.074582 |
| H  | -3.512729 | 4.584962  | -0.582104 | C                     | -0.180596 | 0.509668  | 1.813285  |
| H  | -4.376027 | 3.325279  | -1.487971 | C                     | -3.123747 | 0.150013  | -0.469057 |
| H  | -1.455234 | 2.835782  | 0.056513  | C                     | -2.966178 | -0.428162 | 0.821558  |

#### 4h

SCF done: -850.773130

|    |           |           |           |
|----|-----------|-----------|-----------|
| Ru | 1.068675  | 0.435273  | -0.189529 |
| Si | -1.210464 | 0.131796  | -0.220164 |
| H  | -1.003722 | 2.936709  | -0.914972 |
| Si | -2.467671 | -2.106716 | 1.618840  |
| Si | -4.271789 | -0.670922 | -0.464125 |
| O  | -2.311071 | 1.385898  | -0.440366 |
| O  | 0.936137  | 1.959649  | -2.808264 |
| C  | -2.482566 | -1.299948 | -0.120115 |
| C  | 0.937871  | 1.369023  | -1.805397 |
| C  | 2.846705  | 0.450405  | 1.281667  |
| C  | 3.363115  | 0.365288  | -0.049008 |
| C  | 2.947340  | -0.907010 | -0.607782 |
| C  | 2.181753  | -1.593061 | 0.379215  |
| C  | 2.087025  | -0.741913 | 1.543434  |
| C  | 3.147169  | 1.535063  | 2.278072  |
| H  | 4.043965  | 1.283455  | 2.861980  |
| H  | 2.322703  | 1.675582  | 2.982244  |
| H  | 3.329810  | 2.494676  | 1.786952  |
| C  | 4.312540  | 1.335494  | -0.695717 |
| H  | 4.166953  | 2.352176  | -0.319854 |
| H  | 4.186413  | 1.364363  | -1.782097 |
| H  | 5.355555  | 1.053455  | -0.493483 |
| C  | 3.394269  | -1.460858 | -1.932392 |
| H  | 2.689749  | -2.203117 | -2.318197 |
| H  | 4.373929  | -1.951363 | -1.840221 |
| H  | 3.493126  | -0.675602 | -2.687778 |
| C  | 1.740192  | -3.026501 | 0.309938  |
| H  | 2.518154  | -3.684178 | 0.724530  |
| H  | 1.554775  | -3.346081 | -0.718572 |
| H  | 0.826258  | -3.202856 | 0.882552  |
| C  | 1.535284  | -1.140812 | 2.884585  |
| H  | 0.710038  | -1.850801 | 2.789089  |
| H  | 1.166471  | -0.275828 | 3.443433  |
| H  | 2.311763  | -1.621401 | 3.497811  |
| H  | -5.155635 | -1.871520 | -0.492240 |
| H  | -3.645459 | -2.999252 | 1.773106  |
| H  | -4.772635 | 0.211927  | 0.615623  |
| H  | -2.521949 | -1.074690 | 2.686994  |
| H  | -4.393072 | -0.002776 | -1.780224 |
| H  | -1.248459 | -2.926538 | 1.836874  |
| Si | -2.070811 | -2.632518 | -1.440461 |
| H  | -0.679192 | -3.123943 | -1.322572 |
| H  | -2.985373 | -3.793949 | -1.278666 |
| H  | -2.260642 | -2.080658 | -2.806801 |
| C  | -2.034073 | 2.786245  | -0.580060 |
| H  | 0.575143  | 1.791885  | 0.530586  |
| C  | -2.276142 | 3.543713  | 0.723985  |
| H  | -1.590703 | 3.150926  | 1.486531  |
| H  | -1.983457 | 4.589119  | 0.551092  |

#### 5i

SCF done: -850.736869

|    |           |           |           |
|----|-----------|-----------|-----------|
| Ru | -0.835196 | 0.071519  | 0.126597  |
| Si | 1.289007  | -1.163684 | -0.216893 |
| H  | 1.295633  | -2.381976 | 0.661397  |
| Si | 4.263638  | -1.911486 | -0.459852 |
| Si | 3.429839  | 0.925657  | -1.368645 |
| O  | 0.133130  | 1.393311  | -1.276390 |
| O  | 0.101755  | 0.738889  | 2.917805  |
| C  | 3.084389  | -0.445106 | -0.074582 |
| C  | -0.180596 | 0.509668  | 1.813285  |
| C  | -3.123747 | 0.150013  | -0.469057 |
| C  | -2.966178 | -0.428162 | 0.821558  |
| C  | -2.173869 | -1.636064 | 0.672486  |
| C  | -1.930197 | -1.830819 | -0.741851 |
| C  | -2.454346 | -0.701635 | -1.429842 |
| C  | -3.959978 | 1.347410  | -0.817044 |
| H  | -4.981300 | 1.038748  | -1.080237 |
| H  | -3.557831 | 1.887375  | -1.680310 |
| H  | -4.034751 | 2.050882  | 0.017393  |
| C  | -3.605151 | 0.045893  | 2.096940  |
| H  | -3.781311 | 1.125422  | 2.084829  |
| H  | -2.985577 | -0.179026 | 2.969448  |
| H  | -4.575893 | -0.446382 | 2.246710  |
| C  | -1.930311 | -2.660924 | 1.745526  |
| H  | -1.001108 | -3.210749 | 1.572135  |
| H  | -2.750526 | -3.391508 | 1.777468  |
| H  | -1.860049 | -2.199439 | 2.734607  |
| C  | -1.354956 | -3.069361 | -1.363759 |
| H  | -2.157143 | -3.796017 | -1.553515 |
| H  | -0.622724 | -3.553978 | -0.712060 |
| H  | -0.862764 | -2.861277 | -2.316980 |
| C  | -2.403225 | -0.446087 | -2.908734 |
| H  | -1.697036 | -1.115878 | -3.405261 |
| H  | -2.083815 | 0.579143  | -3.123453 |
| H  | -3.389116 | -0.594319 | -3.369595 |
| H  | 4.902610  | 1.025511  | -1.583576 |
| H  | 5.684514  | -1.486248 | -0.343000 |
| H  | 2.809934  | 0.608400  | -2.678399 |
| H  | 4.048847  | -2.417888 | -1.841228 |
| H  | 2.977994  | 2.262149  | -0.912894 |
| H  | 4.043291  | -3.038339 | 0.484649  |
| Si | 3.506441  | 0.204486  | 1.669628  |
| H  | 3.155328  | -0.794938 | 2.712867  |
| H  | 4.965226  | 0.481780  | 1.777989  |
| H  | 2.792622  | 1.471203  | 1.966823  |
| H  | 1.228932  | -1.689754 | -1.617181 |
| C  | 0.115418  | 3.212497  | 0.366534  |
| H  | 1.036287  | 2.788838  | 0.777624  |
| H  | -0.550498 | 3.451921  | 1.205341  |
| C  | 0.433607  | 4.497797  | -0.420786 |
| H  | 0.895905  | 5.244780  | 0.233845  |
| H  | 1.126176  | 4.288526  | -1.242632 |
| H  | -0.475114 | 4.941389  | -0.846219 |
| C  | -0.554719 | 2.194640  | -0.534076 |
| H  | -1.549017 | 2.499058  | -0.897109 |

#### TS<sub>561</sub>

SCF done: -850.7049794

|    |           |           |           |
|----|-----------|-----------|-----------|
| Ru | -1.054122 | 0.083630  | 0.311856  |
| Si | 1.372853  | -0.874732 | -0.064754 |
| H  | 1.415027  | -1.758802 | 1.146618  |
| Si | 4.157162  | -2.093045 | -0.528438 |
| Si | 3.567703  | 0.661487  | -1.802110 |
| O  | 0.729033  | 0.878878  | -0.640650 |

|    |           |           |           |                       |           |           |           |
|----|-----------|-----------|-----------|-----------------------|-----------|-----------|-----------|
| O  | -0.341544 | 0.228611  | 3.247150  | H                     | 4.488887  | 0.927373  | -1.807295 |
| C  | 3.237370  | -0.426768 | -0.263959 | H                     | 5.598620  | 0.552153  | -0.480817 |
| C  | -0.551399 | 0.208460  | 2.101398  | C                     | 3.561529  | -1.854995 | -1.954734 |
| C  | -3.033872 | 0.374943  | -0.918982 | H                     | 2.850371  | -2.596050 | -2.331922 |
| C  | -3.305938 | 0.018787  | 0.441794  | H                     | 4.536291  | -2.354613 | -1.857487 |
| C  | -2.789633 | -1.326937 | 0.656292  | H                     | 3.668218  | -1.081382 | -2.721223 |
| C  | -2.198446 | -1.777088 | -0.563959 | C                     | 1.585015  | -3.209623 | 0.191691  |
| C  | -2.316411 | -0.706878 | -1.522929 | H                     | 2.183991  | -4.003890 | 0.659473  |
| C  | -3.472338 | 1.638856  | -1.602343 | H                     | 1.428296  | -3.486935 | -0.854743 |
| H  | -4.443043 | 1.499461  | -2.098034 | H                     | 0.608657  | -3.208717 | 0.686617  |
| H  | -2.760899 | 1.956584  | -2.371360 | C                     | 1.504827  | -1.362366 | 2.774193  |
| H  | -3.583720 | 2.462826  | -0.891282 | H                     | 0.535297  | -1.836981 | 2.589613  |
| C  | -4.156090 | 0.794630  | 1.408867  | H                     | 1.322828  | -0.470348 | 3.381725  |
| H  | -4.046545 | 1.873938  | 1.265965  | H                     | 2.097792  | -2.057427 | 3.385950  |
| H  | -3.890724 | 0.573022  | 2.446403  | H                     | -4.738735 | -1.002977 | 2.372212  |
| H  | -5.219833 | 0.548831  | 1.280267  | H                     | -5.233022 | -2.792064 | -0.145662 |
| C  | -3.011924 | -2.155483 | 1.891362  | H                     | -2.426120 | -1.602046 | 2.123019  |
| H  | -2.223672 | -2.902059 | 2.024121  | H                     | -2.886707 | -3.108921 | -0.605092 |
| H  | -3.970085 | -2.689875 | 1.830550  | H                     | -3.064907 | 0.720219  | 2.360481  |
| H  | -3.036278 | -1.538371 | 2.793918  | H                     | -4.324430 | -2.145215 | -2.281410 |
| C  | -1.660008 | -3.150644 | -0.841917 | Si                    | -5.169021 | 0.689420  | -0.507078 |
| H  | -2.434201 | -3.791789 | -1.286729 | H                     | -5.313448 | 0.895237  | -1.971673 |
| H  | -1.313972 | -3.641414 | 0.072776  | H                     | -6.427955 | 0.091390  | 0.006838  |
| H  | -0.818428 | -3.123747 | -1.541133 | H                     | -4.980449 | 2.016608  | 0.133393  |
| C  | -1.846594 | -0.769499 | -2.948790 | H                     | -1.610068 | -0.709274 | -1.988922 |
| H  | -0.900774 | -1.312738 | -3.036483 | C                     | -0.400039 | 2.870650  | 0.243434  |
| H  | -1.695697 | 0.228592  | -3.370174 | H                     | -0.526476 | 2.922894  | -0.844202 |
| H  | -2.582492 | -1.285878 | -3.580819 | H                     | 0.475119  | 3.496259  | 0.465947  |
| H  | 4.997840  | 0.534336  | -2.200928 | C                     | -1.628744 | 3.459674  | 0.957033  |
| H  | 5.624212  | -1.895703 | -0.397270 | H                     | -1.801333 | 4.496416  | 0.645009  |
| H  | 2.741919  | 0.219874  | -2.955312 | H                     | -2.543253 | 2.896478  | 0.739258  |
| H  | 3.882447  | -2.636150 | -1.885291 | H                     | -1.491846 | 3.454511  | 2.045073  |
| H  | 3.317247  | 2.101943  | -1.553172 | C                     | -0.009956 | 1.470425  | 0.667314  |
| H  | 3.735501  | -3.111039 | 0.468636  | H                     | 0.023275  | 1.386609  | 1.760053  |
| Si | 3.962362  | 0.396318  | 1.300838  |                       |           |           |           |
| H  | 3.928313  | -0.544102 | 2.452376  |                       |           |           |           |
| H  | 5.377525  | 0.795364  | 1.075655  | <b>acetone</b>        |           |           |           |
| H  | 3.202867  | 1.614418  | 1.678815  | SCF done: -193.151062 |           |           |           |
| H  | 1.035026  | -1.688720 | -1.260611 | O                     | 0.017670  | 1.393768  | 0.000296  |
| C  | 0.457050  | 2.871919  | 0.850551  | C                     | -0.005743 | 0.178383  | -0.001693 |
| H  | 1.042114  | 2.343994  | 1.611029  | C                     | 1.288976  | -0.628800 | -0.000560 |
| H  | -0.401031 | 3.318408  | 1.370630  | H                     | 1.858509  | -0.390764 | 0.905143  |
| C  | 1.302118  | 3.989245  | 0.216124  | H                     | 1.125180  | -1.709633 | -0.043122 |
| H  | 1.640307  | 4.699603  | 0.979331  | H                     | 1.903168  | -0.323586 | -0.854829 |
| H  | 2.186805  | 3.584328  | -0.284966 | C                     | -1.308271 | -0.600328 | -0.000509 |
| H  | 0.721841  | 4.548990  | -0.527972 | H                     | -2.157073 | 0.086379  | -0.018944 |
| C  | -0.093474 | 1.882586  | -0.153414 | H                     | -1.353571 | -1.272281 | -0.867252 |
| H  | -0.615318 | 2.360394  | -0.991024 | H                     | -1.367342 | -1.235789 | 0.893211  |

**6i**  
SCF done: -850.728586

|    |           |           |           |
|----|-----------|-----------|-----------|
| Ru | 1.354277  | 0.228954  | -0.245269 |
| Si | -2.098206 | 0.233732  | -0.956522 |
| H  | -2.352701 | 1.557783  | -1.573845 |
| Si | -4.046658 | -2.207330 | -0.823001 |
| Si | -3.445391 | -0.584305 | 1.768024  |
| O  | -0.861653 | 0.359650  | 0.225662  |
| O  | 1.493662  | 1.680144  | -2.902842 |
| C  | -3.677703 | -0.455235 | -0.133982 |
| C  | 1.345500  | 1.151459  | -1.871625 |
| C  | 3.049939  | 0.109090  | 1.256299  |
| C  | 3.550085  | 0.004225  | -0.094089 |
| C  | 3.120257  | -1.278270 | -0.639144 |
| C  | 2.270926  | -1.878696 | 0.315840  |
| C  | 2.210324  | -1.021500 | 1.490992  |
| C  | 3.410902  | 1.177859  | 2.247246  |
| H  | 4.295230  | 0.884578  | 2.831241  |
| H  | 2.600142  | 1.366305  | 2.958041  |
| H  | 3.643473  | 2.124142  | 1.750517  |
| C  | 4.583517  | 0.901404  | -0.717835 |
| H  | 4.492307  | 1.929702  | -0.356590 |

**acetophenone**  
SCF done: -384.888408

|   |           |           |           |
|---|-----------|-----------|-----------|
| O | 2.213317  | -1.311634 | -0.000907 |
| C | 1.698148  | -0.203619 | -0.000213 |
| C | 2.562453  | 1.047667  | 0.000856  |
| H | 2.364638  | 1.664973  | -0.883594 |
| H | 2.360461  | 1.665874  | 0.883927  |
| H | 3.611537  | 0.746779  | 0.003664  |
| C | 0.205114  | -0.053680 | -0.000068 |
| C | -0.432669 | 1.196281  | -0.000487 |
| C | -0.577083 | -1.219969 | 0.000279  |
| C | -1.825575 | 1.277755  | -0.000435 |
| H | 0.152933  | 2.110601  | -0.001165 |
| C | -1.966254 | -1.138753 | 0.000506  |
| H | -0.067346 | -2.177832 | 0.000435  |
| C | -2.593503 | 0.111545  | 0.000169  |
| H | -2.310657 | 2.250017  | -0.000848 |
| H | -2.563473 | -2.046549 | 0.000876  |
| H | -3.678415 | 0.175850  | 0.000315  |

**benzophenone**  
SCF done: -576.6206082

|   |           |          |           |
|---|-----------|----------|-----------|
| O | -0.000149 | 2.307181 | -0.000356 |
|---|-----------|----------|-----------|

|   |           |           |           |
|---|-----------|-----------|-----------|
| C | -0.000019 | 1.080594  | -0.000245 |
| C | 1.303894  | 0.337335  | -0.023893 |
| C | 1.453978  | -0.926318 | -0.616524 |
| C | 2.434539  | 0.984226  | 0.501311  |
| C | 2.708840  | -1.535289 | -0.669274 |
| H | 0.596121  | -1.422105 | -1.059254 |
| C | 3.681518  | 0.367230  | 0.465853  |
| H | 2.310806  | 1.972994  | 0.931135  |
| C | 3.821214  | -0.895065 | -0.120335 |
| H | 2.817151  | -2.507682 | -1.141991 |
| H | 4.547480  | 0.870082  | 0.887801  |
| H | 4.796147  | -1.374159 | -0.154436 |
| C | -1.303706 | 0.337005  | 0.023785  |
| C | -1.453835 | -0.926658 | 0.616127  |
| C | -2.434620 | 0.984257  | -0.500799 |
| C | -2.708809 | -1.535501 | 0.669040  |
| H | -0.596000 | -1.422792 | 1.058624  |
| C | -3.681596 | 0.367446  | -0.465240 |
| H | -2.310710 | 1.973210  | -0.930128 |
| C | -3.821225 | -0.895153 | 0.120450  |
| H | -2.817004 | -2.508041 | 1.141487  |
| H | -4.547689 | 0.870613  | -0.886541 |
| H | -4.796157 | -1.374238 | 0.154617  |

**propylaldehyde**

SCF done: -193.139861

|   |           |           |           |
|---|-----------|-----------|-----------|
| O | 1.822334  | -0.037926 | -0.295132 |
| C | 0.786274  | -0.234806 | 0.299446  |
| H | 0.699876  | -1.079905 | 1.023521  |
| C | -0.473420 | 0.589586  | 0.150742  |
| H | -0.299136 | 1.353978  | -0.613040 |
| H | -0.643370 | 1.102856  | 1.109913  |
| C | -1.696668 | -0.282109 | -0.178894 |
| H | -1.842410 | -1.065618 | 0.574465  |
| H | -2.606547 | 0.325453  | -0.208130 |
| H | -1.584200 | -0.769390 | -1.153432 |
